# Supplementary material
Source: publisher figshare collection journal article supplement (https://gsajournals.figshare.com/ndownloader/files/14675414)
Supplement: Supplementary file 1 [file 14675414]

## Sheet: #1
frame	time	PC	TB	ant isth	mid isth	post isth
42	00:00:01.609000
43	00:00:01.648000
44	00:00:01.688000
45	00:00:01.727000
46	00:00:01.767000
47	00:00:01.806000
48	00:00:01.846000
49	00:00:01.885000
50	00:00:01.925000
51	00:00:01.964000
52	00:00:02.004000
53	00:00:02.043000
54	00:00:02.083000
55	00:00:02.122000
56	00:00:02.162000
57	00:00:02.201000
58	00:00:02.241000
59	00:00:02.280000
60	00:00:02.320000
61	00:00:02.360000
62	00:00:02.399000
63	00:00:02.439000
64	00:00:02.478000
65	00:00:02.518000
66	00:00:02.557000
67	00:00:02.597000
68	00:00:02.636000
69	00:00:02.676000
70	00:00:02.715000
71	00:00:02.755000
72	00:00:02.794000
73	00:00:02.834000
74	00:00:02.873000
75	00:00:02.913000
76	00:00:02.952000
77	00:00:02.992000
78	00:00:03.031000
79	00:00:03.071000
80	00:00:03.110000
81	00:00:03.150000
82	00:00:03.189000
83	00:00:03.229000
84	00:00:03.268000
85	00:00:03.308000
86	00:00:03.347000
87	00:00:03.387000
88	00:00:03.426000
89	00:00:03.466000
90	00:00:03.505000
91	00:00:03.545000
92	00:00:03.584000
93	00:00:03.624000
94	00:00:03.663000
95	00:00:03.703000
96	00:00:03.742000
97	00:00:03.782000
98	00:00:03.821000
99	00:00:03.861000
100	00:00:03.901000
101	00:00:03.940000
102	00:00:03.980000
103	00:00:04.019000
104	00:00:04.059000
105	00:00:04.098000
106	00:00:04.138000
107	00:00:04.177000
108	00:00:04.217000
109	00:00:04.256000
110	00:00:04.296000
111	00:00:04.335000
112	00:00:04.375000
113	00:00:04.414000
114	00:00:04.454000
115	00:00:04.493000
116	00:00:04.533000
117	00:00:04.572000
118	00:00:04.612000
119	00:00:04.651000
120	00:00:04.691000
121	00:00:04.730000
122	00:00:04.770000
123	00:00:04.809000
124	00:00:04.849000
125	00:00:04.888000
126	00:00:04.928000
127	00:00:04.967000
128	00:00:05.007000
129	00:00:05.046000
130	00:00:05.086000
131	00:00:05.125000
132	00:00:05.165000
133	00:00:05.204000
134	00:00:05.244000
135	00:00:05.283000
136	00:00:05.323000
137	00:00:05.363000
138	00:00:05.402000
139	00:00:05.442000
140	00:00:05.481000
141	00:00:05.520000
142	00:00:05.560000
143	00:00:05.599000
144	00:00:05.639000
145	00:00:05.679000
146	00:00:05.718000
147	00:00:05.758000
148	00:00:05.797000
149	00:00:05.837000
150	00:00:05.876000
151	00:00:05.916000
152	00:00:05.955000
153	00:00:05.995000
154	00:00:06.034000
155	00:00:06.074000
156	00:00:06.113000
157	00:00:06.153000
158	00:00:06.192000
159	00:00:06.232000
160	00:00:06.271000
161	00:00:06.311000
162	00:00:06.350000
163	00:00:06.390000
164	00:00:06.429000
165	00:00:06.469000
166	00:00:06.508000
167	00:00:06.548000
168	00:00:06.587000
169	00:00:06.627000
170	00:00:06.666000
171	00:00:06.706000
172	00:00:06.745000
173	00:00:06.785000
174	00:00:06.824000
175	00:00:06.864000
176	00:00:06.903000
177	00:00:06.943000
178	00:00:06.982000
179	00:00:07.022000
180	00:00:07.061000
181	00:00:07.101000
182	00:00:07.140000
183	00:00:07.180000
184	00:00:07.220000
185	00:00:07.259000
186	00:00:07.299000
187	00:00:07.338000
188	00:00:07.378000
189	00:00:07.417000
190	00:00:07.457000
191	00:00:07.496000
192	00:00:07.536000
193	00:00:07.575000
194	00:00:07.615000
195	00:00:07.654000
196	00:00:07.694000
197	00:00:07.733000
198	00:00:07.773000
199	00:00:07.812000
200	00:00:07.852000
201	00:00:07.891000
202	00:00:07.931000
203	00:00:07.970000
204	00:00:08.010000
205	00:00:08.049000
206	00:00:08.089000
207	00:00:08.128000
208	00:00:08.168000
209	00:00:08.207000
210	00:00:08.247000
211	00:00:08.286000
212	00:00:08.326000
213	00:00:08.365000
214	00:00:08.405000
215	00:00:08.444000
216	00:00:08.484000
217	00:00:08.523000
218	00:00:08.563000
219	00:00:08.602000
220	00:00:08.642000
221	00:00:08.681000
222	00:00:08.721000
223	00:00:08.761000
224	00:00:08.800000
225	00:00:08.840000
226	00:00:08.879000
227	00:00:08.919000
228	00:00:08.958000
229	00:00:08.998000
230	00:00:09.037000
231	00:00:09.077000
232	00:00:09.116000
233	00:00:09.156000
234	00:00:09.195000
235	00:00:09.235000
236	00:00:09.274000
237	00:00:09.314000
238	00:00:09.353000
239	00:00:09.393000
240	00:00:09.432000
241	00:00:09.472000
242	00:00:09.511000
243	00:00:09.551000
244	00:00:09.590000
245	00:00:09.630000
246	00:00:09.669000
247	00:00:09.709000
248	00:00:09.748000
249	00:00:09.788000
250	00:00:09.827000
251	00:00:09.867000
252	00:00:09.906000
253	00:00:09.946000
254	00:00:09.985000
255	00:00:10.025000
256	00:00:10.064000
257	00:00:10.104000
258	00:00:10.143000
259	00:00:10.183000
260	00:00:10.223000
261	00:00:10.262000
262	00:00:10.302000
263	00:00:10.341000
264	00:00:10.380000
265	00:00:10.420000
266	00:00:10.459000
267	00:00:10.499000
268	00:00:10.539000
269	00:00:10.578000
270	00:00:10.618000
271	00:00:10.657000
272	00:00:10.697000
273	00:00:10.736000
274	00:00:10.776000
275	00:00:10.815000
276	00:00:10.855000
277	00:00:10.894000
278	00:00:10.934000
279	00:00:10.973000
280	00:00:11.013000
281	00:00:11.052000
282	00:00:11.092000
283	00:00:11.131000
284	00:00:11.171000
285	00:00:11.210000
286	00:00:11.250000
287	00:00:11.289000
288	00:00:11.329000
289	00:00:11.368000
290	00:00:11.408000
291	00:00:11.447000
292	00:00:11.487000
293	00:00:11.526000
294	00:00:11.566000
295	00:00:11.605000
296	00:00:11.645000
297	00:00:11.684000
298	00:00:11.724000
299	00:00:11.763000
300	00:00:11.803000
301	00:00:11.842000
302	00:00:11.882000
303	00:00:11.921000
304	00:00:11.961000
305	00:00:12
306	00:00:12.040000
307	00:00:12.080000
308	00:00:12.119000
309	00:00:12.159000
310	00:00:12.198000
311	00:00:12.238000
312	00:00:12.277000
313	00:00:12.317000
314	00:00:12.356000
315	00:00:12.396000
316	00:00:12.435000
317	00:00:12.475000
318	00:00:12.514000
319	00:00:12.554000
320	00:00:12.593000
321	00:00:12.633000
322	00:00:12.672000
323	00:00:12.712000
324	00:00:12.751000
325	00:00:12.791000
326	00:00:12.830000
327	00:00:12.870000
328	00:00:12.909000
329	00:00:12.949000
330	00:00:12.988000
331	00:00:13.028000
332	00:00:13.067000
333	00:00:13.107000
334	00:00:13.146000
335	00:00:13.186000
336	00:00:13.225000
337	00:00:13.265000
338	00:00:13.304000
339	00:00:13.344000
340	00:00:13.383000
341	00:00:13.423000
342	00:00:13.462000
343	00:00:13.502000
344	00:00:13.541000
345	00:00:13.581000
346	00:00:13.621000
347	00:00:13.660000
348	00:00:13.700000
349	00:00:13.739000
350	00:00:13.779000
351	00:00:13.818000
352	00:00:13.858000
353	00:00:13.897000
354	00:00:13.937000
355	00:00:13.976000
356	00:00:14.016000
357	00:00:14.055000
358	00:00:14.095000
359	00:00:14.134000
360	00:00:14.174000
361	00:00:14.213000
362	00:00:14.253000
363	00:00:14.292000
364	00:00:14.332000
365	00:00:14.371000
366	00:00:14.411000
367	00:00:14.450000
368	00:00:14.490000
369	00:00:14.529000
370	00:00:14.569000
371	00:00:14.608000
372	00:00:14.648000
373	00:00:14.687000
374	00:00:14.727000
375	00:00:14.766000
376	00:00:14.806000
377	00:00:14.845000
378	00:00:14.885000
379	00:00:14.924000
380	00:00:14.964000
381	00:00:15.003000
382	00:00:15.043000
383	00:00:15.083000
384	00:00:15.122000
385	00:00:15.162000
386	00:00:15.201000
387	00:00:15.241000
388	00:00:15.280000
389	00:00:15.319000
390	00:00:15.359000
391	00:00:15.399000
392	00:00:15.438000
393	00:00:15.478000
394	00:00:15.517000
395	00:00:15.557000
396	00:00:15.596000
397	00:00:15.636000
398	00:00:15.675000
399	00:00:15.715000
400	00:00:15.754000
401	00:00:15.794000
402	00:00:15.833000
403	00:00:15.873000
404	00:00:15.912000
405	00:00:15.952000
406	00:00:15.991000
407	00:00:16.031000
408	00:00:16.070000
409	00:00:16.110000
410	00:00:16.149000
411	00:00:16.189000
412	00:00:16.228000
413	00:00:16.268000
414	00:00:16.307000
415	00:00:16.347000
416	00:00:16.386000
417	00:00:16.426000
418	00:00:16.465000
419	00:00:16.505000
420	00:00:16.544000
421	00:00:16.584000
422	00:00:16.623000
423	00:00:16.663000
424	00:00:16.702000
425	00:00:16.742000
426	00:00:16.781000
427	00:00:16.821000
428	00:00:16.860000
429	00:00:16.900000
430	00:00:16.940000
431	00:00:16.979000
432	00:00:17.019000
433	00:00:17.058000
434	00:00:17.098000
435	00:00:17.137000
436	00:00:17.177000
437	00:00:17.216000
438	00:00:17.256000
439	00:00:17.295000
440	00:00:17.335000
441	00:00:17.374000
442	00:00:17.414000
443	00:00:17.453000
444	00:00:17.493000
445	00:00:17.532000
446	00:00:17.572000
447	00:00:17.611000
448	00:00:17.651000
449	00:00:17.690000
450	00:00:17.730000
451	00:00:17.769000
452	00:00:17.809000
453	00:00:17.848000
454	00:00:17.888000
455	00:00:17.927000
456	00:00:17.967000
457	00:00:18.006000
458	00:00:18.046000
459	00:00:18.085000
460	00:00:18.125000
461	00:00:18.164000
462	00:00:18.204000
463	00:00:18.243000
464	00:00:18.283000
465	00:00:18.322000
466	00:00:18.362000
467	00:00:18.401000
468	00:00:18.441000
469	00:00:18.481000
470	00:00:18.520000
471	00:00:18.560000
472	00:00:18.599000
473	00:00:18.639000
474	00:00:18.678000
475	00:00:18.718000
476	00:00:18.757000
477	00:00:18.797000
478	00:00:18.836000
479	00:00:18.876000
480	00:00:18.915000
481	00:00:18.955000
482	00:00:18.994000
483	00:00:19.034000
484	00:00:19.073000
485	00:00:19.113000
486	00:00:19.152000
487	00:00:19.192000
488	00:00:19.231000
489	00:00:19.271000
490	00:00:19.310000
491	00:00:19.350000
492	00:00:19.389000
493	00:00:19.429000
494	00:00:19.468000
495	00:00:19.508000
496	00:00:19.547000
497	00:00:19.587000
498	00:00:19.626000
499	00:00:19.666000
500	00:00:19.705000
501	00:00:19.745000
502	00:00:19.784000
503	00:00:19.824000
504	00:00:19.863000
505	00:00:19.903000
506	00:00:19.943000
507	00:00:19.982000
508	00:00:20.022000
509	00:00:20.061000
510	00:00:20.101000
511	00:00:20.140000
512	00:00:20.179000
513	00:00:20.219000
514	00:00:20.259000
515	00:00:20.298000
516	00:00:20.338000
517	00:00:20.377000
518	00:00:20.417000
519	00:00:20.456000
520	00:00:20.496000
521	00:00:20.535000
522	00:00:20.575000
523	00:00:20.614000
524	00:00:20.654000
525	00:00:20.693000
526	00:00:20.733000
527	00:00:20.772000
528	00:00:20.812000
529	00:00:20.851000
530	00:00:20.891000
531	00:00:20.930000
532	00:00:20.970000
533	00:00:21.009000
534	00:00:21.049000
535	00:00:21.088000
536	00:00:21.128000
537	00:00:21.167000
538	00:00:21.207000
539	00:00:21.246000
540	00:00:21.286000
541	00:00:21.325000
542	00:00:21.365000
543	00:00:21.404000
544	00:00:21.444000
545	00:00:21.483000
546	00:00:21.523000
547	00:00:21.562000
548	00:00:21.602000
549	00:00:21.641000
550	00:00:21.681000
551	00:00:21.720000
552	00:00:21.760000
553	00:00:21.800000
554	00:00:21.839000
555	00:00:21.879000
556	00:00:21.918000
557	00:00:21.958000
558	00:00:21.997000
559	00:00:22.037000
560	00:00:22.076000
561	00:00:22.116000
562	00:00:22.155000
563	00:00:22.195000
564	00:00:22.234000
565	00:00:22.274000
566	00:00:22.313000
567	00:00:22.353000
568	00:00:22.392000
569	00:00:22.432000
570	00:00:22.471000
571	00:00:22.511000
572	00:00:22.550000
573	00:00:22.590000
574	00:00:22.629000
575	00:00:22.669000
576	00:00:22.708000
577	00:00:22.748000
578	00:00:22.787000
579	00:00:22.827000
580	00:00:22.866000
581	00:00:22.906000
582	00:00:22.945000
583	00:00:22.985000
584	00:00:23.024000
585	00:00:23.064000
586	00:00:23.103000
587	00:00:23.143000
588	00:00:23.182000
589	00:00:23.222000
590	00:00:23.261000
591	00:00:23.301000
592	00:00:23.341000
593	00:00:23.380000
594	00:00:23.420000
595	00:00:23.459000
596	00:00:23.499000
597	00:00:23.538000
598	00:00:23.578000
599	00:00:23.617000
600	00:00:23.657000
601	00:00:23.696000
602	00:00:23.736000
603	00:00:23.775000
604	00:00:23.815000
605	00:00:23.854000
606	00:00:23.894000
607	00:00:23.933000
608	00:00:23.973000
609	00:00:24.012000
610	00:00:24.052000
611	00:00:24.091000
612	00:00:24.131000
613	00:00:24.170000
614	00:00:24.210000
615	00:00:24.249000
616	00:00:24.289000
617	00:00:24.328000
618	00:00:24.368000
619	00:00:24.407000
620	00:00:24.447000
621	00:00:24.486000
622	00:00:24.526000
623	00:00:24.565000
624	00:00:24.605000
625	00:00:24.644000
626	00:00:24.684000
627	00:00:24.723000
628	00:00:24.763000
629	00:00:24.802000
630	00:00:24.842000
631	00:00:24.882000
632	00:00:24.921000
633	00:00:24.961000
634	00:00:25
635	00:00:25.039000
636	00:00:25.079000
637	00:00:25.119000
638	00:00:25.158000
639	00:00:25.198000
640	00:00:25.237000
641	00:00:25.277000
642	00:00:25.316000
643	00:00:25.356000
644	00:00:25.395000
645	00:00:25.435000
646	00:00:25.474000
647	00:00:25.514000
648	00:00:25.553000
649	00:00:25.593000
650	00:00:25.632000
651	00:00:25.672000
652	00:00:25.711000
653	00:00:25.751000
654	00:00:25.790000
655	00:00:25.830000
656	00:00:25.869000
657	00:00:25.909000
658	00:00:25.949000
659	00:00:25.988000
660	00:00:26.027000
661	00:00:26.067000
662	00:00:26.106000
663	00:00:26.146000
664	00:00:26.185000
665	00:00:26.225000
666	00:00:26.264000
667	00:00:26.304000
668	00:00:26.343000
669	00:00:26.383000
670	00:00:26.422000
671	00:00:26.462000
672	00:00:26.501000
673	00:00:26.541000
674	00:00:26.580000
675	00:00:26.620000
676	00:00:26.660000
677	00:00:26.699000
678	00:00:26.739000
679	00:00:26.778000
680	00:00:26.818000
681	00:00:26.857000
682	00:00:26.897000
683	00:00:26.936000
684	00:00:26.976000
685	00:00:27.015000
686	00:00:27.055000
687	00:00:27.094000
688	00:00:27.134000
689	00:00:27.173000
690	00:00:27.213000
691	00:00:27.252000
692	00:00:27.292000
693	00:00:27.331000
694	00:00:27.371000
695	00:00:27.410000
696	00:00:27.450000
697	00:00:27.489000
698	00:00:27.529000
699	00:00:27.568000
700	00:00:27.608000
701	00:00:27.647000
702	00:00:27.687000
703	00:00:27.726000
704	00:00:27.766000
705	00:00:27.805000
706	00:00:27.845000
707	00:00:27.884000
708	00:00:27.924000
709	00:00:27.963000
710	00:00:28.003000
711	00:00:28.042000
712	00:00:28.082000
713	00:00:28.121000
714	00:00:28.161000
715	00:00:28.201000
716	00:00:28.242000
717	00:00:28.280000
718	00:00:28.319000
719	00:00:28.359000
720	00:00:28.398000
721	00:00:28.438000
722	00:00:28.477000
723	00:00:28.517000
724	00:00:28.556000
725	00:00:28.596000
726	00:00:28.635000
727	00:00:28.675000
728	00:00:28.714000
729	00:00:28.754000
730	00:00:28.793000
731	00:00:28.833000
732	00:00:28.872000
733	00:00:28.912000
734	00:00:28.951000
735	00:00:28.991000
736	00:00:29.030000
737	00:00:29.070000
738	00:00:29.109000
739	00:00:29.149000
740	00:00:29.188000
741	00:00:29.228000
742	00:00:29.267000
743	00:00:29.307000
744	00:00:29.346000
745	00:00:29.386000
746	00:00:29.425000
747	00:00:29.465000
748	00:00:29.504000
749	00:00:29.544000
750	00:00:29.583000
751	00:00:29.623000
752	00:00:29.662000
753	00:00:29.702000
754	00:00:29.742000
755	00:00:29.781000
756	00:00:29.821000
757	00:00:29.860000
758	00:00:29.900000
759	00:00:29.939000
760	00:00:29.979000
761	00:00:30.018000
762	00:00:30.058000
763	00:00:30.097000
764	00:00:30.137000
765	00:00:30.176000
766	00:00:30.216000
767	00:00:30.255000
768	00:00:30.295000
769	00:00:30.334000
770	00:00:30.374000
771	00:00:30.413000
772	00:00:30.453000
773	00:00:30.492000
774	00:00:30.532000
775	00:00:30.571000
776	00:00:30.611000
777	00:00:30.650000
778	00:00:30.690000
779	00:00:30.729000
780	00:00:30.769000
781	00:00:30.808000
782	00:00:30.848000
783	00:00:30.887000
784	00:00:30.927000
785	00:00:30.966000
786	00:00:31.006000
787	00:00:31.045000
788	00:00:31.085000
789	00:00:31.124000
790	00:00:31.164000
791	00:00:31.203000
792	00:00:31.243000
793	00:00:31.282000
794	00:00:31.322000
795	00:00:31.361000
796	00:00:31.401000
797	00:00:31.440000
798	00:00:31.480000
799	00:00:31.520000
800	00:00:31.559000
801	00:00:31.599000
802	00:00:31.638000
803	00:00:31.678000
804	00:00:31.717000
805	00:00:31.757000
806	00:00:31.796000
807	00:00:31.836000
808	00:00:31.875000
809	00:00:31.915000
810	00:00:31.954000
811	00:00:31.994000
812	00:00:32.033000
813	00:00:32.073000
814	00:00:32.112000
815	00:00:32.152000
816	00:00:32.191000
817	00:00:32.231000
818	00:00:32.270000
819	00:00:32.310000
820	00:00:32.349000
821	00:00:32.389000
822	00:00:32.428000
823	00:00:32.468000
824	00:00:32.507000
825	00:00:32.547000
826	00:00:32.586000
827	00:00:32.626000
828	00:00:32.665000
829	00:00:32.705000
830	00:00:32.744000
831	00:00:32.784000
832	00:00:32.823000
833	00:00:32.863000
834	00:00:32.902000
835	00:00:32.942000
836	00:00:32.981000
837	00:00:33.021000
838	00:00:33.061000
839	00:00:33.100000
840	00:00:33.140000
841	00:00:33.179000
842	00:00:33.219000
843	00:00:33.258000
844	00:00:33.298000
845	00:00:33.337000
846	00:00:33.377000
847	00:00:33.416000
848	00:00:33.456000
849	00:00:33.495000
850	00:00:33.535000
851	00:00:33.574000
852	00:00:33.614000
853	00:00:33.653000
854	00:00:33.693000
855	00:00:33.732000
856	00:00:33.772000
857	00:00:33.811000
858	00:00:33.851000
859	00:00:33.890000
860	00:00:33.930000
861	00:00:33.969000
862	00:00:34.009000
863	00:00:34.048000
864	00:00:34.088000
865	00:00:34.127000
866	00:00:34.167000
867	00:00:34.206000
868	00:00:34.246000
869	00:00:34.285000
870	00:00:34.325000
871	00:00:34.364000
872	00:00:34.404000
873	00:00:34.443000
874	00:00:34.483000
875	00:00:34.522000
876	00:00:34.562000
877	00:00:34.602000
878	00:00:34.641000
879	00:00:34.681000
880	00:00:34.720000
881	00:00:34.760000
882	00:00:34.799000
883	00:00:34.839000
884	00:00:34.878000
885	00:00:34.918000
886	00:00:34.957000
887	00:00:34.997000
888	00:00:35.036000
889	00:00:35.076000
890	00:00:35.115000
891	00:00:35.155000
892	00:00:35.194000
893	00:00:35.234000
894	00:00:35.273000
895	00:00:35.313000
896	00:00:35.352000
897	00:00:35.392000
898	00:00:35.431000
899	00:00:35.471000
900	00:00:35.510000
901	00:00:35.550000
902	00:00:35.589000
903	00:00:35.629000
904	00:00:35.668000
905	00:00:35.708000
906	00:00:35.747000
907	00:00:35.787000
908	00:00:35.826000
909	00:00:35.866000
910	00:00:35.905000
911	00:00:35.945000
912	00:00:35.984000
913	00:00:36.024000
914	00:00:36.064000
915	00:00:36.103000
916	00:00:36.142000
917	00:00:36.182000
918	00:00:36.221000
919	00:00:36.261000
920	00:00:36.300000
921	00:00:36.340000
922	00:00:36.380000
923	00:00:36.419000
924	00:00:36.459000
925	00:00:36.498000
926	00:00:36.538000
927	00:00:36.577000
928	00:00:36.617000
929	00:00:36.656000
930	00:00:36.696000
931	00:00:36.735000
932	00:00:36.775000
933	00:00:36.814000
934	00:00:36.854000
935	00:00:36.893000
936	00:00:36.933000
937	00:00:36.972000
938	00:00:37.012000
939	00:00:37.051000
940	00:00:37.091000
941	00:00:37.130000
942	00:00:37.170000
943	00:00:37.209000
944	00:00:37.249000
945	00:00:37.288000
946	00:00:37.328000
947	00:00:37.367000
948	00:00:37.407000
949	00:00:37.446000
950	00:00:37.486000
951	00:00:37.525000
952	00:00:37.565000
953	00:00:37.604000
954	00:00:37.644000
955	00:00:37.683000
956	00:00:37.723000
957	00:00:37.762000
958	00:00:37.802000
959	00:00:37.841000
960	00:00:37.881000
961	00:00:37.921000
962	00:00:37.960000
963	00:00:38
964	00:00:38.039000
965	00:00:38.079000
966	00:00:38.118000
967	00:00:38.158000
968	00:00:38.197000
969	00:00:38.237000
970	00:00:38.276000
971	00:00:38.316000
972	00:00:38.355000
973	00:00:38.395000
974	00:00:38.434000
975	00:00:38.474000
976	00:00:38.513000
977	00:00:38.553000
978	00:00:38.592000
979	00:00:38.632000
980	00:00:38.671000
981	00:00:38.711000
982	00:00:38.750000
983	00:00:38.790000
984	00:00:38.829000
985	00:00:38.869000
986	00:00:38.908000
987	00:00:38.948000
988	00:00:38.987000
989	00:00:39.027000
990	00:00:39.066000
991	00:00:39.106000
992	00:00:39.145000
993	00:00:39.185000
994	00:00:39.224000
995	00:00:39.264000
996	00:00:39.303000
997	00:00:39.343000
998	00:00:39.382000
999	00:00:39.422000
1000	00:00:39.462000
1001	00:00:39.501000
1002	00:00:39.541000
1003	00:00:39.580000
1004	00:00:39.620000
1005	00:00:39.659000
1006	00:00:39.699000
1007	00:00:39.738000
1008	00:00:39.778000
1009	00:00:39.817000
1010	00:00:39.857000
1011	00:00:39.896000
1012	00:00:39.936000
1013	00:00:39.975000
1014	00:00:40.015000
1015	00:00:40.054000
1016	00:00:40.094000
1017	00:00:40.133000
1018	00:00:40.173000
1019	00:00:40.212000
1020	00:00:40.252000
1021	00:00:40.291000
1022	00:00:40.331000
1023	00:00:40.370000
1024	00:00:40.410000
1025	00:00:40.449000
1026	00:00:40.489000
1027	00:00:40.528000
1028	00:00:40.568000
1029	00:00:40.607000
1030	00:00:40.647000
1031	00:00:40.686000
1032	00:00:40.726000
1033	00:00:40.765000
1034	00:00:40.805000
1035	00:00:40.844000
1036	00:00:40.884000
1037	00:00:40.923000
1038	00:00:40.963000
1039	00:00:41.002000
1040	00:00:41.042000
1041	00:00:41.081000
1042	00:00:41.121000
1043	00:00:41.160000
1044	00:00:41.200000
1045	00:00:41.240000
1046	00:00:41.279000
1047	00:00:41.319000
1048	00:00:41.358000
1049	00:00:41.398000
1050	00:00:41.437000
1051	00:00:41.477000
1052	00:00:41.516000
1053	00:00:41.556000
1054	00:00:41.595000
1055	00:00:41.635000
1056	00:00:41.674000
1057	00:00:41.714000
1058	00:00:41.753000
1059	00:00:41.793000
1060	00:00:41.832000
1061	00:00:41.872000
1062	00:00:41.911000
1063	00:00:41.951000
1064	00:00:41.990000
1065	00:00:42.030000
1066	00:00:42.069000
1067	00:00:42.109000
1068	00:00:42.148000
1069	00:00:42.188000
1070	00:00:42.227000
1071	00:00:42.267000
1072	00:00:42.306000
1073	00:00:42.346000
1074	00:00:42.385000
1075	00:00:42.425000
1076	00:00:42.464000
1077	00:00:42.504000
1078	00:00:42.543000
1079	00:00:42.583000
1080	00:00:42.622000
1081	00:00:42.662000
1082	00:00:42.701000
1083	00:00:42.741000
1084	00:00:42.781000
1085	00:00:42.820000
1086	00:00:42.860000
1087	00:00:42.899000
1088	00:00:42.939000
1089	00:00:42.978000
1090	00:00:43.018000
1091	00:00:43.057000
1092	00:00:43.097000
1093	00:00:43.136000
1094	00:00:43.176000
1095	00:00:43.215000
1096	00:00:43.255000
1097	00:00:43.294000
1098	00:00:43.334000
1099	00:00:43.373000
1100	00:00:43.413000
1101	00:00:43.452000
1102	00:00:43.492000
1103	00:00:43.531000
1104	00:00:43.571000
1105	00:00:43.610000
1106	00:00:43.650000
1107	00:00:43.689000
1108	00:00:43.729000
1109	00:00:43.768000
1110	00:00:43.808000
1111	00:00:43.847000
1112	00:00:43.887000
1113	00:00:43.926000
1114	00:00:43.966000
1115	00:00:44.005000
1116	00:00:44.045000
1117	00:00:44.084000
1118	00:00:44.124000
1119	00:00:44.163000
1120	00:00:44.203000
1121	00:00:44.242000
1122	00:00:44.282000
1123	00:00:44.322000
1124	00:00:44.361000
1125	00:00:44.401000
1126	00:00:44.440000
1127	00:00:44.480000
1128	00:00:44.519000
1129	00:00:44.559000
1130	00:00:44.598000
1131	00:00:44.638000
1132	00:00:44.677000
1133	00:00:44.717000
1134	00:00:44.756000
1135	00:00:44.796000

## Sheet: #2
frame	time	PC	TB	ant isth	mid isth	post isth
634	00:00:25.011000
635	00:00:25.050000
636	00:00:25.090000
637	00:00:25.130000
638	00:00:25.169000
639	00:00:25.209000
640	00:00:25.248000
641	00:00:25.288000
642	00:00:25.327000
643	00:00:25.367000
644	00:00:25.406000
645	00:00:25.446000
646	00:00:25.485000
647	00:00:25.525000
648	00:00:25.564000
649	00:00:25.604000
650	00:00:25.643000
651	00:00:25.683000
652	00:00:25.722000
653	00:00:25.762000
654	00:00:25.801000
655	00:00:25.841000
656	00:00:25.880000
657	00:00:25.920000
658	00:00:25.959000
659	00:00:25.999000
660	00:00:26.038000
661	00:00:26.078000
662	00:00:26.117000
663	00:00:26.157000
664	00:00:26.196000
665	00:00:26.236000
666	00:00:26.275000
667	00:00:26.315000
668	00:00:26.354000
669	00:00:26.394000
670	00:00:26.433000
671	00:00:26.473000
672	00:00:26.512000
673	00:00:26.552000
674	00:00:26.591000
675	00:00:26.631000
676	00:00:26.670000
677	00:00:26.710000
678	00:00:26.749000
679	00:00:26.789000
680	00:00:26.828000
681	00:00:26.868000
682	00:00:26.908000
683	00:00:26.947000
684	00:00:26.987000
685	00:00:27.026000
686	00:00:27.066000
687	00:00:27.105000
688	00:00:27.145000
689	00:00:27.184000
690	00:00:27.224000
691	00:00:27.263000
692	00:00:27.303000
693	00:00:27.342000
694	00:00:27.382000
695	00:00:27.421000
696	00:00:27.461000
697	00:00:27.500000
698	00:00:27.540000
699	00:00:27.579000
700	00:00:27.619000
701	00:00:27.658000
702	00:00:27.698000
703	00:00:27.737000
704	00:00:27.777000
705	00:00:27.816000
706	00:00:27.856000
707	00:00:27.895000
708	00:00:27.935000
709	00:00:27.974000
710	00:00:28.014000
711	00:00:28.053000
712	00:00:28.093000
713	00:00:28.132000
714	00:00:28.172000
715	00:00:28.211000
716	00:00:28.251000
717	00:00:28.290000
718	00:00:28.330000
719	00:00:28.369000
720	00:00:28.409000
721	00:00:28.449000
722	00:00:28.488000
723	00:00:28.528000
724	00:00:28.567000
725	00:00:28.607000
726	00:00:28.646000
727	00:00:28.686000
728	00:00:28.725000
729	00:00:28.765000
730	00:00:28.804000
731	00:00:28.844000
732	00:00:28.883000
733	00:00:28.923000
734	00:00:28.962000
735	00:00:29.002000
736	00:00:29.041000
737	00:00:29.081000
738	00:00:29.120000
739	00:00:29.160000
740	00:00:29.199000
741	00:00:29.239000
742	00:00:29.278000
743	00:00:29.318000
744	00:00:29.357000
745	00:00:29.397000
746	00:00:29.436000
747	00:00:29.476000
748	00:00:29.515000
749	00:00:29.555000
750	00:00:29.594000
751	00:00:29.634000
752	00:00:29.673000
753	00:00:29.713000
754	00:00:29.752000
755	00:00:29.792000
756	00:00:29.831000
757	00:00:29.871000
758	00:00:29.910000
759	00:00:29.950000
760	00:00:29.990000
761	00:00:30.029000
762	00:00:30.069000
763	00:00:30.108000
764	00:00:30.148000
765	00:00:30.187000
766	00:00:30.227000
767	00:00:30.266000
768	00:00:30.306000
769	00:00:30.345000
770	00:00:30.385000
771	00:00:30.424000
772	00:00:30.464000
773	00:00:30.503000
774	00:00:30.543000
775	00:00:30.582000
776	00:00:30.622000
777	00:00:30.661000
778	00:00:30.701000
779	00:00:30.740000
780	00:00:30.780000
781	00:00:30.819000
782	00:00:30.859000
783	00:00:30.898000
784	00:00:30.938000
785	00:00:30.977000
786	00:00:31.017000
787	00:00:31.056000
788	00:00:31.096000
789	00:00:31.135000
790	00:00:31.175000
791	00:00:31.214000
792	00:00:31.254000
793	00:00:31.293000
794	00:00:31.333000
795	00:00:31.372000
796	00:00:31.412000
797	00:00:31.451000
798	00:00:31.491000
799	00:00:31.530000
800	00:00:31.570000
801	00:00:31.609000
802	00:00:31.649000
803	00:00:31.688000
804	00:00:31.728000
805	00:00:31.768000
806	00:00:31.807000
807	00:00:31.847000
808	00:00:31.886000
809	00:00:31.926000
810	00:00:31.965000
811	00:00:32.005000
812	00:00:32.044000
813	00:00:32.084000
814	00:00:32.123000
815	00:00:32.163000
816	00:00:32.202000
817	00:00:32.242000
818	00:00:32.281000
819	00:00:32.321000
820	00:00:32.360000
821	00:00:32.400000
822	00:00:32.439000
823	00:00:32.479000
824	00:00:32.518000
825	00:00:32.558000
826	00:00:32.597000
827	00:00:32.637000
828	00:00:32.676000
829	00:00:32.716000
830	00:00:32.755000
831	00:00:32.795000
832	00:00:32.834000
833	00:00:32.874000
834	00:00:32.913000
835	00:00:32.953000
836	00:00:32.992000
837	00:00:33.032000
838	00:00:33.071000
839	00:00:33.111000
840	00:00:33.150000
841	00:00:33.190000
842	00:00:33.229000
843	00:00:33.269000
844	00:00:33.309000
845	00:00:33.348000
846	00:00:33.388000
847	00:00:33.427000
848	00:00:33.467000
849	00:00:33.506000
850	00:00:33.546000
851	00:00:33.585000
852	00:00:33.625000
853	00:00:33.664000
854	00:00:33.704000
855	00:00:33.743000
856	00:00:33.783000
857	00:00:33.822000
858	00:00:33.862000
859	00:00:33.901000
860	00:00:33.941000
861	00:00:33.980000
862	00:00:34.020000
863	00:00:34.059000
864	00:00:34.099000
865	00:00:34.138000
866	00:00:34.178000
867	00:00:34.217000
868	00:00:34.257000
869	00:00:34.296000
870	00:00:34.336000
871	00:00:34.375000
872	00:00:34.415000
873	00:00:34.454000
874	00:00:34.494000
875	00:00:34.533000
876	00:00:34.573000
877	00:00:34.612000
878	00:00:34.652000
879	00:00:34.691000
880	00:00:34.731000
881	00:00:34.770000
882	00:00:34.810000
883	00:00:34.850000
884	00:00:34.889000
885	00:00:34.929000
886	00:00:34.968000
887	00:00:35.008000
888	00:00:35.047000
889	00:00:35.087000
890	00:00:35.126000
891	00:00:35.166000
892	00:00:35.205000
893	00:00:35.245000
894	00:00:35.284000
895	00:00:35.324000
896	00:00:35.363000
897	00:00:35.403000
898	00:00:35.442000
899	00:00:35.482000
900	00:00:35.521000
901	00:00:35.561000
902	00:00:35.600000
903	00:00:35.640000
904	00:00:35.679000
905	00:00:35.719000
906	00:00:35.758000
907	00:00:35.798000
908	00:00:35.837000
909	00:00:35.877000
910	00:00:35.916000
911	00:00:35.956000
912	00:00:35.995000
913	00:00:36.035000
914	00:00:36.074000
915	00:00:36.114000
916	00:00:36.153000
917	00:00:36.193000
918	00:00:36.232000
919	00:00:36.272000
920	00:00:36.311000
921	00:00:36.351000
922	00:00:36.390000
923	00:00:36.430000
924	00:00:36.469000
925	00:00:36.509000
926	00:00:36.549000
927	00:00:36.588000
928	00:00:36.628000
929	00:00:36.667000
930	00:00:36.707000
931	00:00:36.746000
932	00:00:36.786000
933	00:00:36.825000
934	00:00:36.865000
935	00:00:36.904000
936	00:00:36.944000
937	00:00:36.983000
938	00:00:37.023000
939	00:00:37.062000
940	00:00:37.102000
941	00:00:37.141000
942	00:00:37.181000
943	00:00:37.220000
944	00:00:37.260000
945	00:00:37.299000
946	00:00:37.339000
947	00:00:37.378000
948	00:00:37.418000
949	00:00:37.457000
950	00:00:37.497000
951	00:00:37.536000
952	00:00:37.576000
953	00:00:37.615000
954	00:00:37.655000
955	00:00:37.694000
956	00:00:37.734000
957	00:00:37.773000
958	00:00:37.813000
959	00:00:37.852000
960	00:00:37.892000
961	00:00:37.931000
962	00:00:37.971000
963	00:00:38.010000
964	00:00:38.050000
965	00:00:38.089000
966	00:00:38.129000
967	00:00:38.169000
968	00:00:38.208000
969	00:00:38.248000
970	00:00:38.287000
971	00:00:38.327000
972	00:00:38.366000
973	00:00:38.406000
974	00:00:38.445000
975	00:00:38.485000
976	00:00:38.524000
977	00:00:38.564000
978	00:00:38.603000
979	00:00:38.643000
980	00:00:38.682000
981	00:00:38.722000
982	00:00:38.761000
983	00:00:38.801000
984	00:00:38.840000
985	00:00:38.880000
986	00:00:38.919000
987	00:00:38.959000
988	00:00:38.998000
989	00:00:39.038000
990	00:00:39.077000
991	00:00:39.117000
992	00:00:39.156000
993	00:00:39.196000
994	00:00:39.235000
995	00:00:39.275000
996	00:00:39.314000
997	00:00:39.354000
998	00:00:39.393000
999	00:00:39.433000
1000	00:00:39.472000
1001	00:00:39.512000
1002	00:00:39.551000
1003	00:00:39.591000
1004	00:00:39.630000
1005	00:00:39.670000
1006	00:00:39.710000
1007	00:00:39.749000
1008	00:00:39.789000
1009	00:00:39.828000
1010	00:00:39.868000
1011	00:00:39.907000
1012	00:00:39.947000
1013	00:00:39.986000
1014	00:00:40.026000
1015	00:00:40.065000
1016	00:00:40.105000
1017	00:00:40.144000
1018	00:00:40.184000
1019	00:00:40.223000
1020	00:00:40.263000
1021	00:00:40.302000
1022	00:00:40.342000
1023	00:00:40.381000
1024	00:00:40.421000
1025	00:00:40.460000
1026	00:00:40.500000
1027	00:00:40.539000
1028	00:00:40.579000
1029	00:00:40.618000
1030	00:00:40.658000
1031	00:00:40.697000
1032	00:00:40.737000
1033	00:00:40.776000
1034	00:00:40.816000
1035	00:00:40.855000
1036	00:00:40.895000
1037	00:00:40.934000
1038	00:00:40.974000
1039	00:00:41.013000
1040	00:00:41.053000
1041	00:00:41.092000
1042	00:00:41.132000
1043	00:00:41.172000
1044	00:00:41.211000
1045	00:00:41.250000
1046	00:00:41.290000
1047	00:00:41.329000
1048	00:00:41.369000
1049	00:00:41.409000
1050	00:00:41.448000
1051	00:00:41.488000
1052	00:00:41.527000
1053	00:00:41.567000
1054	00:00:41.606000
1055	00:00:41.646000
1056	00:00:41.685000
1057	00:00:41.725000
1058	00:00:41.764000
1059	00:00:41.804000
1060	00:00:41.843000
1061	00:00:41.883000
1062	00:00:41.922000
1063	00:00:41.962000
1064	00:00:42.001000
1065	00:00:42.041000
1066	00:00:42.080000
1067	00:00:42.120000
1068	00:00:42.159000
1069	00:00:42.199000
1070	00:00:42.238000
1071	00:00:42.278000
1072	00:00:42.317000
1073	00:00:42.357000
1074	00:00:42.396000
1075	00:00:42.436000
1076	00:00:42.475000
1077	00:00:42.515000
1078	00:00:42.554000
1079	00:00:42.594000
1080	00:00:42.633000
1081	00:00:42.673000
1082	00:00:42.712000
1083	00:00:42.752000
1084	00:00:42.791000
1085	00:00:42.831000
1086	00:00:42.870000
1087	00:00:42.910000
1088	00:00:42.949000
1089	00:00:42.989000
1090	00:00:43.029000
1091	00:00:43.068000
1092	00:00:43.108000
1093	00:00:43.147000
1094	00:00:43.187000
1095	00:00:43.226000
1096	00:00:43.266000
1097	00:00:43.305000
1098	00:00:43.345000
1099	00:00:43.384000
1100	00:00:43.424000
1101	00:00:43.463000
1102	00:00:43.503000
1103	00:00:43.542000
1104	00:00:43.582000
1105	00:00:43.621000
1106	00:00:43.661000
1107	00:00:43.700000
1108	00:00:43.740000
1109	00:00:43.779000
1110	00:00:43.819000
1111	00:00:43.858000
1112	00:00:43.898000
1113	00:00:43.937000
1114	00:00:43.977000
1115	00:00:44.016000
1116	00:00:44.056000
1117	00:00:44.095000
1118	00:00:44.135000
1119	00:00:44.174000
1120	00:00:44.214000
1121	00:00:44.253000
1122	00:00:44.293000
1123	00:00:44.332000
1124	00:00:44.372000
1125	00:00:44.411000
1126	00:00:44.451000
1127	00:00:44.490000
1128	00:00:44.530000
1129	00:00:44.570000
1130	00:00:44.609000
1131	00:00:44.649000
1132	00:00:44.688000
1133	00:00:44.728000
1134	00:00:44.767000
1135	00:00:44.807000
1136	00:00:44.846000
1137	00:00:44.886000
1138	00:00:44.925000
1139	00:00:44.965000
1140	00:00:45.004000
1141	00:00:45.044000
1142	00:00:45.083000
1143	00:00:45.123000
1144	00:00:45.162000
1145	00:00:45.202000
1146	00:00:45.241000
1147	00:00:45.281000
1148	00:00:45.320000
1149	00:00:45.360000
1150	00:00:45.399000
1151	00:00:45.439000
1152	00:00:45.478000
1153	00:00:45.518000
1154	00:00:45.557000
1155	00:00:45.597000
1156	00:00:45.636000
1157	00:00:45.676000
1158	00:00:45.715000
1159	00:00:45.755000
1160	00:00:45.794000
1161	00:00:45.834000
1162	00:00:45.873000
1163	00:00:45.913000
1164	00:00:45.952000
1165	00:00:45.992000
1166	00:00:46.032000
1167	00:00:46.071000
1168	00:00:46.111000
1169	00:00:46.150000
1170	00:00:46.189000
1171	00:00:46.229000
1172	00:00:46.268000
1173	00:00:46.308000
1174	00:00:46.348000
1175	00:00:46.387000
1176	00:00:46.427000
1177	00:00:46.466000
1178	00:00:46.506000
1179	00:00:46.545000
1180	00:00:46.585000
1181	00:00:46.624000
1182	00:00:46.664000
1183	00:00:46.703000
1184	00:00:46.743000
1185	00:00:46.782000
1186	00:00:46.822000
1187	00:00:46.861000
1188	00:00:46.901000
1189	00:00:46.940000
1190	00:00:46.980000
1191	00:00:47.019000
1192	00:00:47.059000
1193	00:00:47.098000
1194	00:00:47.138000
1195	00:00:47.177000
1196	00:00:47.217000
1197	00:00:47.256000
1198	00:00:47.296000
1199	00:00:47.335000
1200	00:00:47.375000
1201	00:00:47.414000
1202	00:00:47.454000
1203	00:00:47.493000
1204	00:00:47.533000
1205	00:00:47.572000
1206	00:00:47.612000
1207	00:00:47.651000
1208	00:00:47.691000
1209	00:00:47.730000
1210	00:00:47.770000
1211	00:00:47.809000
1212	00:00:47.849000
1213	00:00:47.889000
1214	00:00:47.928000
1215	00:00:47.968000
1216	00:00:48.007000
1217	00:00:48.047000
1218	00:00:48.086000
1219	00:00:48.126000
1220	00:00:48.165000
1221	00:00:48.205000
1222	00:00:48.244000
1223	00:00:48.284000
1224	00:00:48.323000
1225	00:00:48.363000
1226	00:00:48.402000
1227	00:00:48.442000
1228	00:00:48.481000
1229	00:00:48.521000
1230	00:00:48.560000
1231	00:00:48.600000
1232	00:00:48.639000
1233	00:00:48.679000
1234	00:00:48.718000
1235	00:00:48.758000
1236	00:00:48.797000
1237	00:00:48.837000
1238	00:00:48.876000
1239	00:00:48.916000
1240	00:00:48.955000
1241	00:00:48.995000
1242	00:00:49.034000
1243	00:00:49.074000
1244	00:00:49.113000
1245	00:00:49.153000
1246	00:00:49.192000
1247	00:00:49.232000
1248	00:00:49.271000
1249	00:00:49.311000
1250	00:00:49.350000
1251	00:00:49.390000
1252	00:00:49.430000
1253	00:00:49.469000
1254	00:00:49.509000
1255	00:00:49.548000
1256	00:00:49.588000
1257	00:00:49.627000
1258	00:00:49.667000
1259	00:00:49.706000
1260	00:00:49.746000
1261	00:00:49.785000
1262	00:00:49.825000
1263	00:00:49.864000
1264	00:00:49.904000
1265	00:00:49.943000
1266	00:00:49.983000
1267	00:00:50.022000
1268	00:00:50.062000
1269	00:00:50.101000
1270	00:00:50.141000
1271	00:00:50.180000
1272	00:00:50.220000
1273	00:00:50.259000
1274	00:00:50.299000
1275	00:00:50.338000
1276	00:00:50.378000
1277	00:00:50.417000
1278	00:00:50.457000
1279	00:00:50.496000
1280	00:00:50.536000
1281	00:00:50.575000
1282	00:00:50.615000
1283	00:00:50.654000
1284	00:00:50.694000
1285	00:00:50.733000
1286	00:00:50.773000
1287	00:00:50.812000
1288	00:00:50.852000
1289	00:00:50.892000
1290	00:00:50.931000
1291	00:00:50.971000
1292	00:00:51.010000
1293	00:00:51.050000
1294	00:00:51.089000
1295	00:00:51.128000
1296	00:00:51.168000
1297	00:00:51.208000
1298	00:00:51.247000
1299	00:00:51.287000
1300	00:00:51.326000
1301	00:00:51.366000
1302	00:00:51.405000
1303	00:00:51.445000
1304	00:00:51.484000
1305	00:00:51.524000
1306	00:00:51.563000
1307	00:00:51.603000
1308	00:00:51.642000
1309	00:00:51.682000
1310	00:00:51.721000
1311	00:00:51.761000
1312	00:00:51.800000
1313	00:00:51.840000
1314	00:00:51.879000
1315	00:00:51.919000
1316	00:00:51.958000
1317	00:00:51.998000
1318	00:00:52.037000
1319	00:00:52.077000
1320	00:00:52.116000
1321	00:00:52.156000
1322	00:00:52.195000
1323	00:00:52.235000
1324	00:00:52.274000
1325	00:00:52.314000
1326	00:00:52.353000
1327	00:00:52.393000
1328	00:00:52.432000
1329	00:00:52.472000
1330	00:00:52.511000
1331	00:00:52.551000
1332	00:00:52.590000
1333	00:00:52.630000
1334	00:00:52.669000
1335	00:00:52.709000
1336	00:00:52.749000
1337	00:00:52.788000
1338	00:00:52.828000
1339	00:00:52.867000
1340	00:00:52.907000
1341	00:00:52.946000
1342	00:00:52.986000
1343	00:00:53.025000
1344	00:00:53.065000
1345	00:00:53.104000
1346	00:00:53.144000
1347	00:00:53.183000
1348	00:00:53.223000
1349	00:00:53.262000
1350	00:00:53.302000
1351	00:00:53.341000
1352	00:00:53.381000
1353	00:00:53.420000
1354	00:00:53.460000
1355	00:00:53.499000
1356	00:00:53.539000
1357	00:00:53.578000
1358	00:00:53.618000
1359	00:00:53.657000
1360	00:00:53.697000
1361	00:00:53.736000
1362	00:00:53.776000
1363	00:00:53.815000
1364	00:00:53.855000
1365	00:00:53.894000
1366	00:00:53.934000
1367	00:00:53.973000
1368	00:00:54.013000
1369	00:00:54.052000
1370	00:00:54.092000
1371	00:00:54.131000
1372	00:00:54.171000
1373	00:00:54.210000
1374	00:00:54.250000
1375	00:00:54.290000
1376	00:00:54.329000
1377	00:00:54.369000
1378	00:00:54.408000
1379	00:00:54.448000
1380	00:00:54.487000
1381	00:00:54.527000
1382	00:00:54.566000
1383	00:00:54.606000
1384	00:00:54.645000
1385	00:00:54.685000
1386	00:00:54.724000
1387	00:00:54.764000
1388	00:00:54.803000
1389	00:00:54.843000
1390	00:00:54.882000
1391	00:00:54.922000
1392	00:00:54.961000
1393	00:00:55.001000
1394	00:00:55.040000
1395	00:00:55.080000
1396	00:00:55.119000
1397	00:00:55.159000
1398	00:00:55.198000
1399	00:00:55.238000
1400	00:00:55.277000
1401	00:00:55.317000
1402	00:00:55.356000
1403	00:00:55.396000
1404	00:00:55.435000
1405	00:00:55.475000
1406	00:00:55.514000
1407	00:00:55.554000
1408	00:00:55.593000
1409	00:00:55.633000
1410	00:00:55.672000
1411	00:00:55.712000
1412	00:00:55.752000
1413	00:00:55.791000
1414	00:00:55.831000
1415	00:00:55.870000
1416	00:00:55.909000
1417	00:00:55.949000
1418	00:00:55.988000
1419	00:00:56.028000
1420	00:00:56.068000
1421	00:00:56.107000
1422	00:00:56.147000
1423	00:00:56.186000
1424	00:00:56.226000
1425	00:00:56.265000
1426	00:00:56.305000
1427	00:00:56.344000
1428	00:00:56.384000
1429	00:00:56.423000
1430	00:00:56.463000
1431	00:00:56.502000

## Sheet: #3
frame	time	PC	TB	ant isth	mid isth	post isth
110	00:00:04.307000
111	00:00:04.347000
112	00:00:04.386000
113	00:00:04.426000
114	00:00:04.465000
115	00:00:04.505000
116	00:00:04.544000
117	00:00:04.584000
118	00:00:04.623000
119	00:00:04.663000
120	00:00:04.702000
121	00:00:04.742000
122	00:00:04.781000
123	00:00:04.821000
124	00:00:04.860000
125	00:00:04.900000
126	00:00:04.939000
127	00:00:04.979000
128	00:00:05.018000
129	00:00:05.058000
130	00:00:05.097000
131	00:00:05.137000
132	00:00:05.176000
133	00:00:05.216000
134	00:00:05.255000
135	00:00:05.295000
136	00:00:05.334000
137	00:00:05.374000
138	00:00:05.413000
139	00:00:05.453000
140	00:00:05.492000
141	00:00:05.532000
142	00:00:05.571000
143	00:00:05.611000
144	00:00:05.650000
145	00:00:05.690000
146	00:00:05.729000
147	00:00:05.769000
148	00:00:05.809000
149	00:00:05.848000
150	00:00:05.888000
151	00:00:05.927000
152	00:00:05.967000
153	00:00:06.006000
154	00:00:06.046000
155	00:00:06.085000
156	00:00:06.125000
157	00:00:06.164000
158	00:00:06.204000
159	00:00:06.243000
160	00:00:06.283000
161	00:00:06.322000
162	00:00:06.362000
163	00:00:06.401000
164	00:00:06.441000
165	00:00:06.480000
166	00:00:06.520000
167	00:00:06.559000
168	00:00:06.599000
169	00:00:06.638000
170	00:00:06.678000
171	00:00:06.717000
172	00:00:06.757000
173	00:00:06.796000
174	00:00:06.836000
175	00:00:06.875000
176	00:00:06.915000
177	00:00:06.954000
178	00:00:06.994000
179	00:00:07.033000
180	00:00:07.073000
181	00:00:07.112000
182	00:00:07.152000
183	00:00:07.191000
184	00:00:07.231000
185	00:00:07.270000
186	00:00:07.310000
187	00:00:07.349000
188	00:00:07.389000
189	00:00:07.429000
190	00:00:07.468000
191	00:00:07.507000
192	00:00:07.547000
193	00:00:07.587000
194	00:00:07.626000
195	00:00:07.666000
196	00:00:07.705000
197	00:00:07.745000
198	00:00:07.784000
199	00:00:07.824000
200	00:00:07.863000
201	00:00:07.903000
202	00:00:07.942000
203	00:00:07.982000
204	00:00:08.021000
205	00:00:08.061000
206	00:00:08.100000
207	00:00:08.140000
208	00:00:08.180000
209	00:00:08.219000
210	00:00:08.258000
211	00:00:08.298000
212	00:00:08.337000
213	00:00:08.377000
214	00:00:08.416000
215	00:00:08.456000
216	00:00:08.495000
217	00:00:08.535000
218	00:00:08.574000
219	00:00:08.614000
220	00:00:08.653000
221	00:00:08.693000
222	00:00:08.732000
223	00:00:08.772000
224	00:00:08.811000
225	00:00:08.851000
226	00:00:08.890000
227	00:00:08.930000
228	00:00:08.969000
229	00:00:09.009000
230	00:00:09.048000
231	00:00:09.088000
232	00:00:09.128000
233	00:00:09.167000
234	00:00:09.207000
235	00:00:09.246000
236	00:00:09.286000
237	00:00:09.325000
238	00:00:09.365000
239	00:00:09.404000
240	00:00:09.444000
241	00:00:09.483000
242	00:00:09.523000
243	00:00:09.562000
244	00:00:09.602000
245	00:00:09.641000
246	00:00:09.681000
247	00:00:09.720000
248	00:00:09.760000
249	00:00:09.799000
250	00:00:09.839000
251	00:00:09.878000
252	00:00:09.918000
253	00:00:09.957000
254	00:00:09.997000
255	00:00:10.036000
256	00:00:10.076000
257	00:00:10.115000
258	00:00:10.155000
259	00:00:10.194000
260	00:00:10.234000
261	00:00:10.273000
262	00:00:10.313000
263	00:00:10.352000
264	00:00:10.392000
265	00:00:10.431000
266	00:00:10.471000
267	00:00:10.510000
268	00:00:10.550000
269	00:00:10.589000
270	00:00:10.629000
271	00:00:10.669000
272	00:00:10.708000
273	00:00:10.748000
274	00:00:10.787000
275	00:00:10.827000
276	00:00:10.866000
277	00:00:10.906000
278	00:00:10.945000
279	00:00:10.985000
280	00:00:11.024000
281	00:00:11.064000
282	00:00:11.103000
283	00:00:11.143000
284	00:00:11.182000
285	00:00:11.222000
286	00:00:11.261000
287	00:00:11.301000
288	00:00:11.340000
289	00:00:11.380000
290	00:00:11.419000
291	00:00:11.459000
292	00:00:11.498000
293	00:00:11.538000
294	00:00:11.577000
295	00:00:11.617000
296	00:00:11.656000
297	00:00:11.696000
298	00:00:11.735000
299	00:00:11.775000
300	00:00:11.814000
301	00:00:11.854000
302	00:00:11.893000
303	00:00:11.933000
304	00:00:11.972000
305	00:00:12.012000
306	00:00:12.051000
307	00:00:12.091000
308	00:00:12.130000
309	00:00:12.170000
310	00:00:12.210000
311	00:00:12.249000
312	00:00:12.288000
313	00:00:12.328000
314	00:00:12.367000
315	00:00:12.407000
316	00:00:12.447000
317	00:00:12.486000
318	00:00:12.526000
319	00:00:12.565000
320	00:00:12.605000
321	00:00:12.644000
322	00:00:12.684000
323	00:00:12.723000
324	00:00:12.763000
325	00:00:12.802000
326	00:00:12.842000
327	00:00:12.881000
328	00:00:12.921000
329	00:00:12.960000
330	00:00:13
331	00:00:13.039000
332	00:00:13.079000
333	00:00:13.118000
334	00:00:13.158000
335	00:00:13.197000
336	00:00:13.237000
337	00:00:13.276000
338	00:00:13.316000
339	00:00:13.355000
340	00:00:13.395000
341	00:00:13.434000
342	00:00:13.474000
343	00:00:13.513000
344	00:00:13.553000
345	00:00:13.592000
346	00:00:13.632000
347	00:00:13.671000
348	00:00:13.711000
349	00:00:13.750000
350	00:00:13.790000
351	00:00:13.829000
352	00:00:13.869000
353	00:00:13.908000
354	00:00:13.948000
355	00:00:13.988000
356	00:00:14.027000
357	00:00:14.067000
358	00:00:14.106000
359	00:00:14.146000
360	00:00:14.185000
361	00:00:14.225000
362	00:00:14.264000
363	00:00:14.304000
364	00:00:14.343000
365	00:00:14.383000
366	00:00:14.422000
367	00:00:14.462000
368	00:00:14.501000
369	00:00:14.541000
370	00:00:14.580000
371	00:00:14.620000
372	00:00:14.659000
373	00:00:14.699000
374	00:00:14.738000
375	00:00:14.778000
376	00:00:14.817000
377	00:00:14.857000
378	00:00:14.896000
379	00:00:14.936000
380	00:00:14.975000
381	00:00:15.015000
382	00:00:15.054000
383	00:00:15.094000
384	00:00:15.133000
385	00:00:15.173000
386	00:00:15.212000
387	00:00:15.252000
388	00:00:15.291000
389	00:00:15.331000
390	00:00:15.370000
391	00:00:15.410000
392	00:00:15.449000
393	00:00:15.489000
394	00:00:15.529000
395	00:00:15.568000
396	00:00:15.608000
397	00:00:15.647000
398	00:00:15.687000
399	00:00:15.726000
400	00:00:15.766000
401	00:00:15.805000
402	00:00:15.845000
403	00:00:15.884000
404	00:00:15.924000
405	00:00:15.963000
406	00:00:16.003000
407	00:00:16.042000
408	00:00:16.082000
409	00:00:16.121000
410	00:00:16.161000
411	00:00:16.200000
412	00:00:16.240000
413	00:00:16.279000
414	00:00:16.319000
415	00:00:16.358000
416	00:00:16.398000
417	00:00:16.437000
418	00:00:16.477000
419	00:00:16.516000
420	00:00:16.556000
421	00:00:16.595000
422	00:00:16.635000
423	00:00:16.674000
424	00:00:16.714000
425	00:00:16.753000
426	00:00:16.793000
427	00:00:16.832000
428	00:00:16.872000
429	00:00:16.911000
430	00:00:16.951000
431	00:00:16.991000
432	00:00:17.030000
433	00:00:17.070000
434	00:00:17.109000
435	00:00:17.149000
436	00:00:17.188000
437	00:00:17.227000
438	00:00:17.267000
439	00:00:17.307000
440	00:00:17.346000
441	00:00:17.386000
442	00:00:17.425000
443	00:00:17.465000
444	00:00:17.504000
445	00:00:17.544000
446	00:00:17.583000
447	00:00:17.623000
448	00:00:17.662000
449	00:00:17.702000
450	00:00:17.741000
451	00:00:17.781000
452	00:00:17.820000
453	00:00:17.860000
454	00:00:17.899000
455	00:00:17.939000
456	00:00:17.978000
457	00:00:18.018000
458	00:00:18.057000
459	00:00:18.097000
460	00:00:18.136000
461	00:00:18.176000
462	00:00:18.215000
463	00:00:18.255000
464	00:00:18.294000
465	00:00:18.334000
466	00:00:18.373000
467	00:00:18.413000
468	00:00:18.452000
469	00:00:18.492000
470	00:00:18.531000
471	00:00:18.571000
472	00:00:18.610000
473	00:00:18.650000
474	00:00:18.689000
475	00:00:18.729000
476	00:00:18.768000
477	00:00:18.808000
478	00:00:18.848000
479	00:00:18.887000
480	00:00:18.927000
481	00:00:18.966000
482	00:00:19.006000
483	00:00:19.045000
484	00:00:19.085000
485	00:00:19.124000
486	00:00:19.164000
487	00:00:19.203000
488	00:00:19.243000
489	00:00:19.282000
490	00:00:19.322000
491	00:00:19.361000
492	00:00:19.401000
493	00:00:19.440000
494	00:00:19.480000		4
495	00:00:19.519000
496	00:00:19.559000
497	00:00:19.598000
498	00:00:19.638000
499	00:00:19.677000
500	00:00:19.717000
501	00:00:19.756000
502	00:00:19.796000
503	00:00:19.835000
504	00:00:19.875000
505	00:00:19.914000
506	00:00:19.954000
507	00:00:19.993000
508	00:00:20.033000
509	00:00:20.072000
510	00:00:20.112000
511	00:00:20.151000
512	00:00:20.191000
513	00:00:20.230000
514	00:00:20.270000
515	00:00:20.309000
516	00:00:20.349000
517	00:00:20.389000
518	00:00:20.428000
519	00:00:20.468000
520	00:00:20.507000
521	00:00:20.547000
522	00:00:20.586000
523	00:00:20.626000
524	00:00:20.665000
525	00:00:20.705000
526	00:00:20.744000
527	00:00:20.784000
528	00:00:20.823000
529	00:00:20.863000
530	00:00:20.902000
531	00:00:20.942000
532	00:00:20.981000
533	00:00:21.021000
534	00:00:21.060000
535	00:00:21.100000
536	00:00:21.139000
537	00:00:21.179000
538	00:00:21.218000
539	00:00:21.258000
540	00:00:21.297000
541	00:00:21.337000
542	00:00:21.376000
543	00:00:21.416000
544	00:00:21.455000
545	00:00:21.495000
546	00:00:21.534000
547	00:00:21.574000
548	00:00:21.613000
549	00:00:21.653000
550	00:00:21.692000
551	00:00:21.732000
552	00:00:21.771000
553	00:00:21.811000
554	00:00:21.851000
555	00:00:21.890000
556	00:00:21.930000
557	00:00:21.969000
558	00:00:22.009000
559	00:00:22.048000
560	00:00:22.087000
561	00:00:22.127000
562	00:00:22.167000
563	00:00:22.206000
564	00:00:22.246000
565	00:00:22.285000
566	00:00:22.325000
567	00:00:22.364000
568	00:00:22.404000
569	00:00:22.443000
570	00:00:22.483000
571	00:00:22.522000
572	00:00:22.562000
573	00:00:22.601000
574	00:00:22.641000
575	00:00:22.680000
576	00:00:22.720000
577	00:00:22.759000
578	00:00:22.799000
579	00:00:22.838000
580	00:00:22.878000
581	00:00:22.917000
582	00:00:22.957000
583	00:00:22.996000
584	00:00:23.036000
585	00:00:23.075000
586	00:00:23.115000
587	00:00:23.154000
588	00:00:23.194000
589	00:00:23.233000
590	00:00:23.273000
591	00:00:23.312000
592	00:00:23.352000
593	00:00:23.391000
594	00:00:23.431000
595	00:00:23.470000
596	00:00:23.510000
597	00:00:23.549000
598	00:00:23.589000
599	00:00:23.628000
600	00:00:23.668000
601	00:00:23.708000
602	00:00:23.747000
603	00:00:23.787000
604	00:00:23.826000
605	00:00:23.866000
606	00:00:23.905000
607	00:00:23.945000
608	00:00:23.984000
609	00:00:24.024000
610	00:00:24.063000
611	00:00:24.103000
612	00:00:24.142000
613	00:00:24.182000
614	00:00:24.221000
615	00:00:24.261000
616	00:00:24.300000
617	00:00:24.340000
618	00:00:24.379000
619	00:00:24.419000
620	00:00:24.458000
621	00:00:24.498000
622	00:00:24.537000
623	00:00:24.577000
624	00:00:24.616000
625	00:00:24.656000
626	00:00:24.695000
627	00:00:24.735000
628	00:00:24.774000
629	00:00:24.814000
630	00:00:24.853000
631	00:00:24.893000
632	00:00:24.932000
633	00:00:24.972000
634	00:00:25.011000
635	00:00:25.051000
636	00:00:25.090000
637	00:00:25.130000
638	00:00:25.169000
639	00:00:25.209000
640	00:00:25.249000
641	00:00:25.288000
642	00:00:25.328000
643	00:00:25.367000
644	00:00:25.407000
645	00:00:25.446000
646	00:00:25.486000
647	00:00:25.525000
648	00:00:25.565000
649	00:00:25.604000
650	00:00:25.644000
651	00:00:25.683000
652	00:00:25.723000
653	00:00:25.762000
654	00:00:25.802000
655	00:00:25.841000
656	00:00:25.881000
657	00:00:25.920000
658	00:00:25.960000
659	00:00:25.999000
660	00:00:26.039000
661	00:00:26.078000
662	00:00:26.118000
663	00:00:26.157000
664	00:00:26.197000
665	00:00:26.236000
666	00:00:26.276000
667	00:00:26.315000
668	00:00:26.355000
669	00:00:26.394000
670	00:00:26.434000
671	00:00:26.473000
672	00:00:26.513000
673	00:00:26.552000
674	00:00:26.592000
675	00:00:26.631000
676	00:00:26.671000
677	00:00:26.711000
678	00:00:26.750000
679	00:00:26.790000
680	00:00:26.829000
681	00:00:26.869000
682	00:00:26.908000
683	00:00:26.948000
684	00:00:26.987000
685	00:00:27.027000
686	00:00:27.066000
687	00:00:27.106000
688	00:00:27.145000
689	00:00:27.185000
690	00:00:27.224000
691	00:00:27.264000
692	00:00:27.303000
693	00:00:27.343000
694	00:00:27.382000
695	00:00:27.422000
696	00:00:27.461000
697	00:00:27.501000
698	00:00:27.540000
699	00:00:27.580000
700	00:00:27.619000
701	00:00:27.659000
702	00:00:27.698000
703	00:00:27.738000
704	00:00:27.777000
705	00:00:27.817000
706	00:00:27.856000
707	00:00:27.896000

## Sheet: #7
frame	time	PC	TB	ant isth	mid isth	post isth
1	00:00:00
2	00:00:00.039000
3	00:00:00.079000
4	00:00:00.141000
5	00:00:00.173000
6	00:00:00.219000
7	00:00:00.266000
8	00:00:00.297000
9	00:00:00.344000
10	00:00:00.375000
11	00:00:00.422000
12	00:00:00.453000
13	00:00:00.500000
14	00:00:00.531000
15	00:00:00.578000
16	00:00:00.609000
17	00:00:00.656000
18	00:00:00.687000
19	00:00:00.720000
20	00:00:00.751000
21	00:00:00.791000
22	00:00:00.830000
23	00:00:00.870000
24	00:00:00.909000
25	00:00:00.949000
26	00:00:00.988000
27	00:00:01.028000
28	00:00:01.067000
29	00:00:01.107000
30	00:00:01.146000
31	00:00:01.186000
32	00:00:01.225000
33	00:00:01.265000
34	00:00:01.304000
35	00:00:01.344000
36	00:00:01.383000
37	00:00:01.423000
38	00:00:01.462000
39	00:00:01.502000
40	00:00:01.541000
41	00:00:01.581000
42	00:00:01.620000
43	00:00:01.660000
44	00:00:01.699000
45	00:00:01.739000
46	00:00:01.778000
47	00:00:01.818000
48	00:00:01.857000
49	00:00:01.897000
50	00:00:01.936000
51	00:00:01.976000
52	00:00:02.015000
53	00:00:02.055000
54	00:00:02.094000
55	00:00:02.134000
56	00:00:02.173000
57	00:00:02.213000
58	00:00:02.252000
59	00:00:02.292000
60	00:00:02.332000
61	00:00:02.371000
62	00:00:02.411000
63	00:00:02.450000
64	00:00:02.490000
65	00:00:02.529000
66	00:00:02.569000
67	00:00:02.608000
68	00:00:02.648000
69	00:00:02.687000
70	00:00:02.727000
71	00:00:02.766000
72	00:00:02.806000
73	00:00:02.845000
74	00:00:02.885000
75	00:00:02.924000
76	00:00:02.964000
77	00:00:03.003000
78	00:00:03.043000
79	00:00:03.082000
80	00:00:03.122000
81	00:00:03.161000
82	00:00:03.201000
83	00:00:03.240000
84	00:00:03.280000
85	00:00:03.319000
86	00:00:03.359000
87	00:00:03.398000
88	00:00:03.438000
89	00:00:03.477000
90	00:00:03.517000
91	00:00:03.557000
92	00:00:03.596000
93	00:00:03.635000
94	00:00:03.675000
95	00:00:03.714000
96	00:00:03.754000
97	00:00:03.793000
98	00:00:03.833000
99	00:00:03.873000
100	00:00:03.912000
101	00:00:03.952000
102	00:00:03.991000
103	00:00:04.031000
104	00:00:04.070000
105	00:00:04.110000
106	00:00:04.149000
107	00:00:04.189000
108	00:00:04.228000
109	00:00:04.268000
110	00:00:04.307000
111	00:00:04.347000
112	00:00:04.386000
113	00:00:04.426000
114	00:00:04.465000
115	00:00:04.505000
116	00:00:04.544000
117	00:00:04.584000
118	00:00:04.623000
119	00:00:04.663000
120	00:00:04.702000
121	00:00:04.742000
122	00:00:04.781000
123	00:00:04.821000
124	00:00:04.860000
125	00:00:04.900000
126	00:00:04.939000
127	00:00:04.979000
128	00:00:05.018000
129	00:00:05.058000
130	00:00:05.097000
131	00:00:05.137000
132	00:00:05.176000
133	00:00:05.216000
134	00:00:05.255000
135	00:00:05.295000
136	00:00:05.334000
137	00:00:05.374000
138	00:00:05.414000
139	00:00:05.453000
140	00:00:05.493000
141	00:00:05.532000
142	00:00:05.572000
143	00:00:05.611000
144	00:00:05.651000
145	00:00:05.690000
146	00:00:05.730000
147	00:00:05.769000
148	00:00:05.809000
149	00:00:05.848000
150	00:00:05.888000
151	00:00:05.927000
152	00:00:05.967000
153	00:00:06.006000
154	00:00:06.046000
155	00:00:06.085000
156	00:00:06.125000
157	00:00:06.164000
158	00:00:06.204000
159	00:00:06.243000
160	00:00:06.283000
161	00:00:06.322000
162	00:00:06.362000
163	00:00:06.401000
164	00:00:06.441000
165	00:00:06.480000
166	00:00:06.520000
167	00:00:06.559000
168	00:00:06.599000
169	00:00:06.638000
170	00:00:06.678000
171	00:00:06.717000
172	00:00:06.757000
173	00:00:06.796000
174	00:00:06.836000
175	00:00:06.876000
176	00:00:06.915000
177	00:00:06.954000
178	00:00:06.994000
179	00:00:07.033000
180	00:00:07.073000
181	00:00:07.112000
182	00:00:07.152000
183	00:00:07.192000
184	00:00:07.231000
185	00:00:07.271000
186	00:00:07.310000
187	00:00:07.350000
188	00:00:07.389000
189	00:00:07.429000
190	00:00:07.468000
191	00:00:07.508000
192	00:00:07.547000
193	00:00:07.587000
194	00:00:07.626000
195	00:00:07.666000
196	00:00:07.705000
197	00:00:07.745000
198	00:00:07.784000
199	00:00:07.824000
200	00:00:07.863000
201	00:00:07.903000
202	00:00:07.942000
203	00:00:07.982000
204	00:00:08.021000
205	00:00:08.061000
206	00:00:08.100000
207	00:00:08.140000
208	00:00:08.179000
209	00:00:08.219000
210	00:00:08.258000
211	00:00:08.298000
212	00:00:08.337000
213	00:00:08.377000
214	00:00:08.416000
215	00:00:08.456000
216	00:00:08.495000
217	00:00:08.535000
218	00:00:08.574000
219	00:00:08.614000
220	00:00:08.653000
221	00:00:08.693000
222	00:00:08.733000
223	00:00:08.772000
224	00:00:08.812000
225	00:00:08.851000
226	00:00:08.891000
227	00:00:08.930000
228	00:00:08.970000
229	00:00:09.009000
230	00:00:09.049000
231	00:00:09.088000
232	00:00:09.128000
233	00:00:09.167000
234	00:00:09.207000
235	00:00:09.246000
236	00:00:09.286000
237	00:00:09.325000
238	00:00:09.365000
239	00:00:09.404000
240	00:00:09.444000
241	00:00:09.483000
242	00:00:09.524000
243	00:00:09.563000
244	00:00:09.603000
245	00:00:09.642000
246	00:00:09.682000
247	00:00:09.721000
248	00:00:09.761000
249	00:00:09.800000
250	00:00:09.840000
251	00:00:09.879000
252	00:00:09.919000
253	00:00:09.958000
254	00:00:09.998000
255	00:00:10.037000
256	00:00:10.077000
257	00:00:10.116000
258	00:00:10.156000
259	00:00:10.195000
260	00:00:10.235000
261	00:00:10.275000
262	00:00:10.314000
263	00:00:10.354000
264	00:00:10.393000
265	00:00:10.433000
266	00:00:10.472000
267	00:00:10.512000
268	00:00:10.551000
269	00:00:10.591000
270	00:00:10.630000
271	00:00:10.670000
272	00:00:10.709000
273	00:00:10.749000
274	00:00:10.788000
275	00:00:10.828000
276	00:00:10.867000
277	00:00:10.907000
278	00:00:10.946000
279	00:00:10.986000
280	00:00:11.025000
281	00:00:11.065000
282	00:00:11.104000
283	00:00:11.144000
284	00:00:11.183000
285	00:00:11.223000
286	00:00:11.262000
287	00:00:11.302000
288	00:00:11.341000
289	00:00:11.381000
290	00:00:11.420000
291	00:00:11.460000
292	00:00:11.499000
293	00:00:11.539000
294	00:00:11.578000
295	00:00:11.618000
296	00:00:11.657000
297	00:00:11.697000
298	00:00:11.737000
299	00:00:11.776000
300	00:00:11.816000
301	00:00:11.855000
302	00:00:11.895000
303	00:00:11.934000
304	00:00:11.973000
305	00:00:12.013000
306	00:00:12.053000
307	00:00:12.092000
308	00:00:12.132000
309	00:00:12.171000
310	00:00:12.211000
311	00:00:12.250000
312	00:00:12.290000
313	00:00:12.329000
314	00:00:12.369000
315	00:00:12.408000
316	00:00:12.448000
317	00:00:12.487000
318	00:00:12.527000
319	00:00:12.566000
320	00:00:12.606000
321	00:00:12.645000
322	00:00:12.685000
323	00:00:12.724000
324	00:00:12.764000
325	00:00:12.803000
326	00:00:12.843000
327	00:00:12.882000
328	00:00:12.922000
329	00:00:12.961000
330	00:00:13.001000
331	00:00:13.040000
332	00:00:13.080000
333	00:00:13.119000
334	00:00:13.159000
335	00:00:13.198000
336	00:00:13.238000
337	00:00:13.277000
338	00:00:13.317000
339	00:00:13.356000
340	00:00:13.396000
341	00:00:13.435000
342	00:00:13.475000
343	00:00:13.514000
344	00:00:13.554000
345	00:00:13.594000
346	00:00:13.633000
347	00:00:13.673000
348	00:00:13.712000
349	00:00:13.752000
350	00:00:13.791000
351	00:00:13.831000
352	00:00:13.870000
353	00:00:13.910000
354	00:00:13.949000
355	00:00:13.989000
356	00:00:14.028000
357	00:00:14.068000
358	00:00:14.107000
359	00:00:14.147000
360	00:00:14.186000
361	00:00:14.226000
362	00:00:14.265000
363	00:00:14.305000
364	00:00:14.344000
365	00:00:14.384000
366	00:00:14.423000
367	00:00:14.463000
368	00:00:14.502000
369	00:00:14.542000
370	00:00:14.581000
371	00:00:14.621000
372	00:00:14.660000
373	00:00:14.700000
374	00:00:14.739000
375	00:00:14.779000
376	00:00:14.818000
377	00:00:14.858000
378	00:00:14.897000
379	00:00:14.937000
380	00:00:14.976000
381	00:00:15.016000
382	00:00:15.055000
383	00:00:15.095000
384	00:00:15.135000
385	00:00:15.174000
386	00:00:15.214000
387	00:00:15.253000
388	00:00:15.293000
389	00:00:15.332000
390	00:00:15.372000
391	00:00:15.411000
392	00:00:15.451000
393	00:00:15.490000
394	00:00:15.530000
395	00:00:15.569000
396	00:00:15.609000
397	00:00:15.648000
398	00:00:15.688000
399	00:00:15.727000
400	00:00:15.767000
401	00:00:15.806000
402	00:00:15.846000
403	00:00:15.885000
404	00:00:15.925000
405	00:00:15.964000
406	00:00:16.004000
407	00:00:16.043000
408	00:00:16.083000
409	00:00:16.122000
410	00:00:16.162000
411	00:00:16.201000
412	00:00:16.241000
413	00:00:16.280000
414	00:00:16.320000
415	00:00:16.359000
416	00:00:16.399000
417	00:00:16.438000
418	00:00:16.478000
419	00:00:16.517000
420	00:00:16.557000
421	00:00:16.597000
422	00:00:16.636000
423	00:00:16.676000
424	00:00:16.715000
425	00:00:16.755000
426	00:00:16.794000
427	00:00:16.833000
428	00:00:16.873000
429	00:00:16.913000
430	00:00:16.952000
431	00:00:16.992000
432	00:00:17.031000
433	00:00:17.071000
434	00:00:17.110000
435	00:00:17.150000
436	00:00:17.189000
437	00:00:17.229000
438	00:00:17.268000
439	00:00:17.308000
440	00:00:17.347000
441	00:00:17.387000
442	00:00:17.426000
443	00:00:17.466000
444	00:00:17.505000
445	00:00:17.545000
446	00:00:17.584000
447	00:00:17.624000
448	00:00:17.663000
449	00:00:17.703000
450	00:00:17.742000
451	00:00:17.782000
452	00:00:17.821000
453	00:00:17.861000
454	00:00:17.900000
455	00:00:17.940000
456	00:00:17.979000
457	00:00:18.019000
458	00:00:18.058000
459	00:00:18.098000
460	00:00:18.137000
461	00:00:18.177000
462	00:00:18.216000
463	00:00:18.256000
464	00:00:18.295000
465	00:00:18.335000
466	00:00:18.374000
467	00:00:18.414000
468	00:00:18.454000
469	00:00:18.493000
470	00:00:18.533000
471	00:00:18.572000
472	00:00:18.612000
473	00:00:18.651000
474	00:00:18.691000
475	00:00:18.730000
476	00:00:18.770000
477	00:00:18.809000
478	00:00:18.849000
479	00:00:18.888000
480	00:00:18.928000
481	00:00:18.967000
482	00:00:19.007000
483	00:00:19.046000
484	00:00:19.086000
485	00:00:19.125000
486	00:00:19.165000
487	00:00:19.204000
488	00:00:19.244000
489	00:00:19.283000
490	00:00:19.323000
491	00:00:19.362000
492	00:00:19.402000
493	00:00:19.441000
494	00:00:19.481000
495	00:00:19.521000
496	00:00:19.561000
497	00:00:19.600000
498	00:00:19.640000
499	00:00:19.679000
500	00:00:19.719000
501	00:00:19.758000
502	00:00:19.798000
503	00:00:19.837000
504	00:00:19.877000
505	00:00:19.916000
506	00:00:19.956000
507	00:00:19.996000
508	00:00:20.035000
509	00:00:20.075000
510	00:00:20.114000
511	00:00:20.154000
512	00:00:20.193000
513	00:00:20.233000
514	00:00:20.272000
515	00:00:20.312000
516	00:00:20.351000
517	00:00:20.391000
518	00:00:20.430000
519	00:00:20.470000
520	00:00:20.509000
521	00:00:20.549000
522	00:00:20.588000
523	00:00:20.628000
524	00:00:20.667000
525	00:00:20.707000
526	00:00:20.746000
527	00:00:20.786000
528	00:00:20.825000
529	00:00:20.865000
530	00:00:20.904000
531	00:00:20.944000
532	00:00:20.983000
533	00:00:21.023000
534	00:00:21.062000
535	00:00:21.102000
536	00:00:21.141000
537	00:00:21.181000
538	00:00:21.220000
539	00:00:21.260000
540	00:00:21.299000
541	00:00:21.339000
542	00:00:21.378000
543	00:00:21.418000
544	00:00:21.458000
545	00:00:21.497000
546	00:00:21.537000
547	00:00:21.576000
548	00:00:21.615000
549	00:00:21.655000
550	00:00:21.695000
551	00:00:21.734000
552	00:00:21.774000
553	00:00:21.813000
554	00:00:21.853000
555	00:00:21.892000
556	00:00:21.932000
557	00:00:21.971000
558	00:00:22.011000
559	00:00:22.050000
560	00:00:22.090000
561	00:00:22.129000
562	00:00:22.169000
563	00:00:22.208000
564	00:00:22.248000
565	00:00:22.287000
566	00:00:22.327000
567	00:00:22.366000
568	00:00:22.406000
569	00:00:22.445000
570	00:00:22.485000
571	00:00:22.524000
572	00:00:22.564000
573	00:00:22.603000
574	00:00:22.643000
575	00:00:22.682000
576	00:00:22.722000
577	00:00:22.761000
578	00:00:22.801000
579	00:00:22.840000
580	00:00:22.880000
581	00:00:22.919000
582	00:00:22.959000
583	00:00:22.998000
584	00:00:23.038000
585	00:00:23.077000
586	00:00:23.117000
587	00:00:23.156000
588	00:00:23.196000
589	00:00:23.235000
590	00:00:23.275000
591	00:00:23.315000
592	00:00:23.354000
593	00:00:23.394000
594	00:00:23.433000
595	00:00:23.473000
596	00:00:23.512000
597	00:00:23.552000
598	00:00:23.591000
599	00:00:23.631000
600	00:00:23.670000
601	00:00:23.710000
602	00:00:23.749000
603	00:00:23.789000
604	00:00:23.828000
605	00:00:23.868000
606	00:00:23.907000
607	00:00:23.947000
608	00:00:23.986000
609	00:00:24.026000
610	00:00:24.065000
611	00:00:24.105000
612	00:00:24.144000
613	00:00:24.184000
614	00:00:24.223000
615	00:00:24.263000
616	00:00:24.302000
617	00:00:24.342000
618	00:00:24.381000
619	00:00:24.421000
620	00:00:24.460000
621	00:00:24.500000
622	00:00:24.539000
623	00:00:24.579000
624	00:00:24.618000
625	00:00:24.658000
626	00:00:24.697000
627	00:00:24.737000
628	00:00:24.777000
629	00:00:24.816000
630	00:00:24.856000
631	00:00:24.895000
632	00:00:24.935000
633	00:00:24.974000
634	00:00:25.014000
635	00:00:25.053000
636	00:00:25.093000
637	00:00:25.132000
638	00:00:25.172000
639	00:00:25.211000
640	00:00:25.251000
641	00:00:25.290000
642	00:00:25.330000
643	00:00:25.369000
644	00:00:25.409000
645	00:00:25.448000
646	00:00:25.488000
647	00:00:25.527000
648	00:00:25.567000
649	00:00:25.606000
650	00:00:25.646000
651	00:00:25.685000
652	00:00:25.725000
653	00:00:25.764000
654	00:00:25.804000
655	00:00:25.843000
656	00:00:25.883000
657	00:00:25.922000
658	00:00:25.962000
659	00:00:26.001000
660	00:00:26.041000
661	00:00:26.080000
662	00:00:26.120000
663	00:00:26.159000
664	00:00:26.199000
665	00:00:26.238000
666	00:00:26.278000
667	00:00:26.318000
668	00:00:26.357000
669	00:00:26.397000
670	00:00:26.436000
671	00:00:26.476000
672	00:00:26.515000
673	00:00:26.554000
674	00:00:26.594000
675	00:00:26.634000
676	00:00:26.673000
677	00:00:26.713000
678	00:00:26.752000
679	00:00:26.792000
680	00:00:26.831000
681	00:00:26.871000
682	00:00:26.910000
683	00:00:26.950000
684	00:00:26.989000
685	00:00:27.029000
686	00:00:27.068000
687	00:00:27.108000
688	00:00:27.147000
689	00:00:27.187000
690	00:00:27.226000
691	00:00:27.266000
692	00:00:27.305000
693	00:00:27.345000
694	00:00:27.384000
695	00:00:27.424000
696	00:00:27.463000
697	00:00:27.503000
698	00:00:27.542000
699	00:00:27.582000
700	00:00:27.621000
701	00:00:27.661000
702	00:00:27.700000
703	00:00:27.740000
704	00:00:27.779000
705	00:00:27.819000
706	00:00:27.859000
707	00:00:27.898000
708	00:00:27.937000
709	00:00:27.977000
710	00:00:28.016000
711	00:00:28.056000
712	00:00:28.095000
713	00:00:28.135000
714	00:00:28.175000
715	00:00:28.214000
716	00:00:28.254000
717	00:00:28.293000
718	00:00:28.333000
719	00:00:28.372000
720	00:00:28.412000
721	00:00:28.451000
722	00:00:28.491000
723	00:00:28.530000
724	00:00:28.570000
725	00:00:28.609000
726	00:00:28.649000
727	00:00:28.688000
728	00:00:28.728000
729	00:00:28.767000
730	00:00:28.807000
731	00:00:28.846000
732	00:00:28.886000
733	00:00:28.925000
734	00:00:28.965000
735	00:00:29.004000
736	00:00:29.044000
737	00:00:29.083000
738	00:00:29.123000
739	00:00:29.162000
740	00:00:29.202000
741	00:00:29.241000
742	00:00:29.281000
743	00:00:29.320000
744	00:00:29.360000
745	00:00:29.399000
746	00:00:29.439000
747	00:00:29.478000
748	00:00:29.518000
749	00:00:29.558000
750	00:00:29.598000
751	00:00:29.638000
752	00:00:29.677000
753	00:00:29.717000
754	00:00:29.756000
755	00:00:29.796000
756	00:00:29.835000
757	00:00:29.875000
758	00:00:29.914000
759	00:00:29.954000
760	00:00:29.993000
761	00:00:30.033000
762	00:00:30.072000
763	00:00:30.112000
764	00:00:30.151000
765	00:00:30.191000
766	00:00:30.230000
767	00:00:30.270000
768	00:00:30.309000
769	00:00:30.349000
770	00:00:30.388000
771	00:00:30.428000
772	00:00:30.467000
773	00:00:30.507000
774	00:00:30.546000
775	00:00:30.586000
776	00:00:30.625000
777	00:00:30.665000
778	00:00:30.704000
779	00:00:30.744000
780	00:00:30.783000
781	00:00:30.823000
782	00:00:30.862000
783	00:00:30.902000
784	00:00:30.941000
785	00:00:30.981000
786	00:00:31.020000
787	00:00:31.060000
788	00:00:31.099000
789	00:00:31.139000
790	00:00:31.179000
791	00:00:31.218000
792	00:00:31.258000
793	00:00:31.297000
794	00:00:31.337000
795	00:00:31.376000
796	00:00:31.416000
797	00:00:31.455000
798	00:00:31.495000
799	00:00:31.534000
800	00:00:31.574000
801	00:00:31.613000
802	00:00:31.653000
803	00:00:31.692000
804	00:00:31.732000
805	00:00:31.771000
806	00:00:31.811000
807	00:00:31.850000
808	00:00:31.890000
809	00:00:31.929000
810	00:00:31.969000
811	00:00:32.008000
812	00:00:32.048000
813	00:00:32.087000
814	00:00:32.127000
815	00:00:32.166000
816	00:00:32.206000
817	00:00:32.245000
818	00:00:32.285000
819	00:00:32.324000
820	00:00:32.364000
821	00:00:32.403000
822	00:00:32.443000

## Sheet: #10
frame	time	PC	TB	ant isth	mid isth	post isth
124	00:00:04.860000
125	00:00:04.900000
126	00:00:04.939000
127	00:00:04.979000
128	00:00:05.018000
129	00:00:05.058000
130	00:00:05.097000
131	00:00:05.137000
132	00:00:05.176000
133	00:00:05.216000
134	00:00:05.255000
135	00:00:05.295000
136	00:00:05.334000
137	00:00:05.374000
138	00:00:05.413000
139	00:00:05.453000
140	00:00:05.492000
141	00:00:05.532000
142	00:00:05.571000
143	00:00:05.611000
144	00:00:05.650000
145	00:00:05.690000
146	00:00:05.730000
147	00:00:05.769000
148	00:00:05.809000
149	00:00:05.848000
150	00:00:05.888000
151	00:00:05.927000
152	00:00:05.967000
153	00:00:06.006000
154	00:00:06.046000
155	00:00:06.085000
156	00:00:06.125000
157	00:00:06.164000
158	00:00:06.204000
159	00:00:06.243000
160	00:00:06.283000
161	00:00:06.322000
162	00:00:06.362000
163	00:00:06.401000
164	00:00:06.441000
165	00:00:06.480000
166	00:00:06.520000
167	00:00:06.559000
168	00:00:06.599000
169	00:00:06.638000
170	00:00:06.678000
171	00:00:06.717000
172	00:00:06.757000
173	00:00:06.796000
174	00:00:06.836000
175	00:00:06.875000
176	00:00:06.915000
177	00:00:06.954000
178	00:00:06.994000
179	00:00:07.033000
180	00:00:07.073000
181	00:00:07.112000
182	00:00:07.152000
183	00:00:07.191000
184	00:00:07.231000
185	00:00:07.271000
186	00:00:07.310000
187	00:00:07.350000
188	00:00:07.389000
189	00:00:07.429000
190	00:00:07.469000
191	00:00:07.509000
192	00:00:07.548000
193	00:00:07.588000
194	00:00:07.627000
195	00:00:07.667000
196	00:00:07.706000
197	00:00:07.746000
198	00:00:07.785000
199	00:00:07.825000
200	00:00:07.864000
201	00:00:07.904000
202	00:00:07.943000
203	00:00:07.983000
204	00:00:08.022000
205	00:00:08.062000
206	00:00:08.101000
207	00:00:08.141000
208	00:00:08.180000
209	00:00:08.220000
210	00:00:08.259000
211	00:00:08.299000
212	00:00:08.338000
213	00:00:08.378000
214	00:00:08.417000
215	00:00:08.457000
216	00:00:08.496000
217	00:00:08.536000
218	00:00:08.575000
219	00:00:08.615000
220	00:00:08.654000
221	00:00:08.694000
222	00:00:08.733000
223	00:00:08.773000
224	00:00:08.812000
225	00:00:08.852000
226	00:00:08.891000
227	00:00:08.931000
228	00:00:08.970000
229	00:00:09.010000
230	00:00:09.049000
231	00:00:09.089000
232	00:00:09.129000
233	00:00:09.168000
234	00:00:09.208000
235	00:00:09.247000
236	00:00:09.287000
237	00:00:09.326000
238	00:00:09.366000
239	00:00:09.405000
240	00:00:09.445000
241	00:00:09.484000
242	00:00:09.524000
243	00:00:09.563000
244	00:00:09.603000
245	00:00:09.642000
246	00:00:09.682000
247	00:00:09.721000
248	00:00:09.761000
249	00:00:09.800000
250	00:00:09.840000
251	00:00:09.879000
252	00:00:09.919000
253	00:00:09.958000
254	00:00:09.998000
255	00:00:10.037000
256	00:00:10.077000
257	00:00:10.116000
258	00:00:10.156000
259	00:00:10.195000
260	00:00:10.235000
261	00:00:10.274000
262	00:00:10.314000
263	00:00:10.353000
264	00:00:10.393000
265	00:00:10.432000
266	00:00:10.472000
267	00:00:10.511000
268	00:00:10.551000
269	00:00:10.591000
270	00:00:10.630000
271	00:00:10.670000
272	00:00:10.709000
273	00:00:10.749000
274	00:00:10.788000
275	00:00:10.828000
276	00:00:10.867000
277	00:00:10.907000
278	00:00:10.946000
279	00:00:10.986000
280	00:00:11.025000
281	00:00:11.065000
282	00:00:11.104000
283	00:00:11.144000
284	00:00:11.183000
285	00:00:11.223000
286	00:00:11.262000
287	00:00:11.302000
288	00:00:11.341000
289	00:00:11.381000
290	00:00:11.420000
291	00:00:11.460000
292	00:00:11.499000
293	00:00:11.539000
294	00:00:11.578000
295	00:00:11.618000
296	00:00:11.657000
297	00:00:11.697000
298	00:00:11.736000
299	00:00:11.776000
300	00:00:11.815000
301	00:00:11.855000
302	00:00:11.894000
303	00:00:11.934000
304	00:00:11.973000
305	00:00:12.013000
306	00:00:12.052000
307	00:00:12.092000
308	00:00:12.132000
309	00:00:12.171000
310	00:00:12.211000
311	00:00:12.250000
312	00:00:12.290000
313	00:00:12.329000
314	00:00:12.369000
315	00:00:12.408000
316	00:00:12.448000
317	00:00:12.487000
318	00:00:12.527000
319	00:00:12.566000
320	00:00:12.606000
321	00:00:12.645000
322	00:00:12.685000
323	00:00:12.724000
324	00:00:12.764000
325	00:00:12.803000
326	00:00:12.843000
327	00:00:12.882000
328	00:00:12.922000
329	00:00:12.961000
330	00:00:13.001000
331	00:00:13.040000
332	00:00:13.080000
333	00:00:13.119000
334	00:00:13.159000
335	00:00:13.198000
336	00:00:13.238000
337	00:00:13.277000
338	00:00:13.317000
339	00:00:13.356000
340	00:00:13.396000
341	00:00:13.435000
342	00:00:13.475000
343	00:00:13.514000
344	00:00:13.554000
345	00:00:13.593000
346	00:00:13.633000
347	00:00:13.673000
348	00:00:13.712000
349	00:00:13.751000
350	00:00:13.791000
351	00:00:13.830000
352	00:00:13.870000
353	00:00:13.910000
354	00:00:13.949000
355	00:00:13.989000
356	00:00:14.028000
357	00:00:14.068000
358	00:00:14.107000
359	00:00:14.147000
360	00:00:14.186000
361	00:00:14.226000
362	00:00:14.265000
363	00:00:14.305000
364	00:00:14.344000
365	00:00:14.384000
366	00:00:14.423000
367	00:00:14.463000
368	00:00:14.502000
369	00:00:14.542000
370	00:00:14.581000
371	00:00:14.621000
372	00:00:14.660000
373	00:00:14.700000
374	00:00:14.739000
375	00:00:14.779000
376	00:00:14.818000
377	00:00:14.858000
378	00:00:14.897000
379	00:00:14.937000
380	00:00:14.976000
381	00:00:15.016000
382	00:00:15.055000
383	00:00:15.095000
384	00:00:15.134000
385	00:00:15.174000
386	00:00:15.213000
387	00:00:15.253000
388	00:00:15.292000
389	00:00:15.332000
390	00:00:15.371000
391	00:00:15.411000
392	00:00:15.451000
393	00:00:15.490000
394	00:00:15.530000
395	00:00:15.569000
396	00:00:15.609000
397	00:00:15.648000
398	00:00:15.688000
399	00:00:15.727000
400	00:00:15.767000
401	00:00:15.806000
402	00:00:15.846000
403	00:00:15.885000
404	00:00:15.925000
405	00:00:15.964000
406	00:00:16.004000
407	00:00:16.043000
408	00:00:16.083000
409	00:00:16.122000
410	00:00:16.162000
411	00:00:16.201000
412	00:00:16.241000
413	00:00:16.280000
414	00:00:16.320000
415	00:00:16.359000
416	00:00:16.399000
417	00:00:16.438000
418	00:00:16.478000
419	00:00:16.517000
420	00:00:16.557000
421	00:00:16.596000
422	00:00:16.636000
423	00:00:16.675000
424	00:00:16.715000
425	00:00:16.754000
426	00:00:16.794000
427	00:00:16.833000
428	00:00:16.873000
429	00:00:16.912000
430	00:00:16.952000
431	00:00:16.992000
432	00:00:17.031000
433	00:00:17.071000
434	00:00:17.110000
435	00:00:17.150000
436	00:00:17.189000
437	00:00:17.229000
438	00:00:17.268000
439	00:00:17.308000
440	00:00:17.347000
441	00:00:17.387000
442	00:00:17.426000
443	00:00:17.467000
444	00:00:17.506000
445	00:00:17.546000
446	00:00:17.585000
447	00:00:17.625000
448	00:00:17.664000
449	00:00:17.704000
450	00:00:17.743000
451	00:00:17.783000
452	00:00:17.822000
453	00:00:17.862000
454	00:00:17.901000
455	00:00:17.941000
456	00:00:17.980000
457	00:00:18.020000
458	00:00:18.059000
459	00:00:18.099000
460	00:00:18.138000
461	00:00:18.178000
462	00:00:18.217000
463	00:00:18.257000
464	00:00:18.296000
465	00:00:18.336000
466	00:00:18.375000
467	00:00:18.415000
468	00:00:18.455000
469	00:00:18.494000
470	00:00:18.533000
471	00:00:18.573000
472	00:00:18.612000
473	00:00:18.652000
474	00:00:18.691000
475	00:00:18.731000
476	00:00:18.771000
477	00:00:18.810000
478	00:00:18.850000
479	00:00:18.889000
480	00:00:18.929000
481	00:00:18.968000
482	00:00:19.008000
483	00:00:19.047000
484	00:00:19.087000
485	00:00:19.126000
486	00:00:19.166000
487	00:00:19.205000
488	00:00:19.245000
489	00:00:19.284000
490	00:00:19.324000
491	00:00:19.363000
492	00:00:19.403000
493	00:00:19.442000
494	00:00:19.482000
495	00:00:19.521000
496	00:00:19.561000
497	00:00:19.600000
498	00:00:19.640000
499	00:00:19.679000
500	00:00:19.719000
501	00:00:19.758000
502	00:00:19.798000
503	00:00:19.837000
504	00:00:19.877000
505	00:00:19.916000
506	00:00:19.956000
507	00:00:19.995000
508	00:00:20.035000
509	00:00:20.074000
510	00:00:20.114000
511	00:00:20.153000
512	00:00:20.193000
513	00:00:20.232000
514	00:00:20.272000
515	00:00:20.312000
516	00:00:20.351000
517	00:00:20.391000
518	00:00:20.430000
519	00:00:20.470000
520	00:00:20.509000
521	00:00:20.549000
522	00:00:20.588000
523	00:00:20.628000
524	00:00:20.667000
525	00:00:20.707000
526	00:00:20.746000
527	00:00:20.786000
528	00:00:20.825000
529	00:00:20.865000
530	00:00:20.904000
531	00:00:20.944000
532	00:00:20.983000
533	00:00:21.023000
534	00:00:21.062000
535	00:00:21.102000
536	00:00:21.141000
537	00:00:21.181000
538	00:00:21.220000
539	00:00:21.260000
540	00:00:21.299000
541	00:00:21.339000
542	00:00:21.378000
543	00:00:21.418000
544	00:00:21.457000
545	00:00:21.497000
546	00:00:21.536000
547	00:00:21.576000
548	00:00:21.615000
549	00:00:21.655000
550	00:00:21.694000
551	00:00:21.734000
552	00:00:21.773000
553	00:00:21.813000
554	00:00:21.853000
555	00:00:21.892000
556	00:00:21.932000
557	00:00:21.971000
558	00:00:22.011000
559	00:00:22.050000
560	00:00:22.090000
561	00:00:22.129000
562	00:00:22.169000
563	00:00:22.208000
564	00:00:22.248000
565	00:00:22.287000
566	00:00:22.327000
567	00:00:22.366000
568	00:00:22.406000
569	00:00:22.445000
570	00:00:22.485000
571	00:00:22.524000
572	00:00:22.564000
573	00:00:22.603000
574	00:00:22.643000
575	00:00:22.682000
576	00:00:22.722000
577	00:00:22.761000
578	00:00:22.801000
579	00:00:22.840000
580	00:00:22.880000
581	00:00:22.919000
582	00:00:22.959000
583	00:00:22.998000
584	00:00:23.038000
585	00:00:23.077000
586	00:00:23.117000
587	00:00:23.156000
588	00:00:23.196000
589	00:00:23.235000
590	00:00:23.275000
591	00:00:23.315000
592	00:00:23.354000
593	00:00:23.394000
594	00:00:23.433000
595	00:00:23.472000
596	00:00:23.512000
597	00:00:23.551000
598	00:00:23.591000
599	00:00:23.631000
600	00:00:23.670000
601	00:00:23.710000
602	00:00:23.749000
603	00:00:23.789000
604	00:00:23.828000
605	00:00:23.868000
606	00:00:23.907000
607	00:00:23.947000
608	00:00:23.986000
609	00:00:24.026000
610	00:00:24.065000
611	00:00:24.105000
612	00:00:24.144000
613	00:00:24.184000
614	00:00:24.223000
615	00:00:24.263000
616	00:00:24.302000
617	00:00:24.342000
618	00:00:24.381000
619	00:00:24.421000
620	00:00:24.460000
621	00:00:24.500000
622	00:00:24.539000
623	00:00:24.579000
624	00:00:24.618000
625	00:00:24.658000
626	00:00:24.697000
627	00:00:24.737000
628	00:00:24.776000
629	00:00:24.816000
630	00:00:24.855000
631	00:00:24.895000
632	00:00:24.934000
633	00:00:24.974000
634	00:00:25.013000
635	00:00:25.053000
636	00:00:25.092000
637	00:00:25.132000
638	00:00:25.172000
639	00:00:25.211000
640	00:00:25.251000
641	00:00:25.290000
642	00:00:25.330000
643	00:00:25.369000
644	00:00:25.409000
645	00:00:25.448000
646	00:00:25.488000
647	00:00:25.527000
648	00:00:25.567000
649	00:00:25.606000
650	00:00:25.646000
651	00:00:25.685000
652	00:00:25.725000
653	00:00:25.764000
654	00:00:25.804000
655	00:00:25.843000
656	00:00:25.883000
657	00:00:25.922000
658	00:00:25.962000
659	00:00:26.001000
660	00:00:26.041000
661	00:00:26.080000
662	00:00:26.120000
663	00:00:26.159000
664	00:00:26.199000
665	00:00:26.238000
666	00:00:26.278000
667	00:00:26.317000
668	00:00:26.357000
669	00:00:26.396000
670	00:00:26.436000
671	00:00:26.475000
672	00:00:26.515000
673	00:00:26.554000
674	00:00:26.594000
675	00:00:26.633000
676	00:00:26.673000
677	00:00:26.713000
678	00:00:26.752000
679	00:00:26.792000
680	00:00:26.831000
681	00:00:26.871000
682	00:00:26.910000
683	00:00:26.950000
684	00:00:26.989000
685	00:00:27.029000
686	00:00:27.068000
687	00:00:27.108000
688	00:00:27.147000
689	00:00:27.187000
690	00:00:27.226000
691	00:00:27.266000
692	00:00:27.305000
693	00:00:27.345000
694	00:00:27.384000
695	00:00:27.424000
696	00:00:27.464000
697	00:00:27.504000
698	00:00:27.543000
699	00:00:27.583000
700	00:00:27.622000
701	00:00:27.662000
702	00:00:27.701000
703	00:00:27.741000
704	00:00:27.780000
705	00:00:27.820000
706	00:00:27.859000
707	00:00:27.899000
708	00:00:27.938000
709	00:00:27.978000
710	00:00:28.017000
711	00:00:28.057000
712	00:00:28.096000
713	00:00:28.136000
714	00:00:28.176000
715	00:00:28.215000
716	00:00:28.255000
717	00:00:28.294000
718	00:00:28.334000
719	00:00:28.373000
720	00:00:28.413000
721	00:00:28.452000
722	00:00:28.492000
723	00:00:28.531000
724	00:00:28.571000
725	00:00:28.610000
726	00:00:28.650000
727	00:00:28.689000
728	00:00:28.729000
729	00:00:28.768000
730	00:00:28.808000
731	00:00:28.847000
732	00:00:28.887000
733	00:00:28.926000
734	00:00:28.966000
735	00:00:29.005000
736	00:00:29.045000
737	00:00:29.084000
738	00:00:29.124000
739	00:00:29.163000
740	00:00:29.203000
741	00:00:29.242000
742	00:00:29.282000
743	00:00:29.321000
744	00:00:29.361000
745	00:00:29.400000
746	00:00:29.440000
747	00:00:29.479000
748	00:00:29.519000
749	00:00:29.558000
750	00:00:29.598000
751	00:00:29.637000
752	00:00:29.677000
753	00:00:29.716000
754	00:00:29.756000
755	00:00:29.795000
756	00:00:29.835000
757	00:00:29.874000
758	00:00:29.914000
759	00:00:29.953000
760	00:00:29.993000
761	00:00:30.033000
762	00:00:30.072000
763	00:00:30.112000
764	00:00:30.151000
765	00:00:30.191000
766	00:00:30.230000
767	00:00:30.270000
768	00:00:30.309000
769	00:00:30.349000
770	00:00:30.388000
771	00:00:30.428000
772	00:00:30.467000
773	00:00:30.507000
774	00:00:30.546000
775	00:00:30.586000
776	00:00:30.625000
777	00:00:30.665000
778	00:00:30.704000
779	00:00:30.744000
780	00:00:30.783000
781	00:00:30.823000
782	00:00:30.862000
783	00:00:30.902000
784	00:00:30.941000
785	00:00:30.981000
786	00:00:31.020000
787	00:00:31.060000
788	00:00:31.099000
789	00:00:31.139000
790	00:00:31.178000
791	00:00:31.218000
792	00:00:31.257000
793	00:00:31.297000
794	00:00:31.336000
795	00:00:31.376000
796	00:00:31.415000
797	00:00:31.455000
798	00:00:31.495000
799	00:00:31.534000

## Sheet: #11
frame	time	PC	TB	ant isth	mid isth	post isth
650	00:00:25.646000
651	00:00:25.686000
652	00:00:25.725000
653	00:00:25.765000
654	00:00:25.804000
655	00:00:25.844000
656	00:00:25.883000
657	00:00:25.923000
658	00:00:25.962000
659	00:00:26.002000
660	00:00:26.041000
661	00:00:26.081000
662	00:00:26.120000
663	00:00:26.160000
664	00:00:26.199000
665	00:00:26.239000
666	00:00:26.279000
667	00:00:26.318000
668	00:00:26.358000
669	00:00:26.397000
670	00:00:26.437000
671	00:00:26.476000
672	00:00:26.515000
673	00:00:26.555000
674	00:00:26.595000
675	00:00:26.634000
676	00:00:26.674000
677	00:00:26.713000
678	00:00:26.753000
679	00:00:26.792000
680	00:00:26.832000
681	00:00:26.871000
682	00:00:26.911000
683	00:00:26.950000
684	00:00:26.990000
685	00:00:27.029000
686	00:00:27.069000
687	00:00:27.108000
688	00:00:27.148000
689	00:00:27.187000
690	00:00:27.227000
691	00:00:27.266000
692	00:00:27.306000
693	00:00:27.345000
694	00:00:27.385000
695	00:00:27.424000
696	00:00:27.464000
697	00:00:27.503000
698	00:00:27.543000
699	00:00:27.582000
700	00:00:27.622000
701	00:00:27.661000
702	00:00:27.701000
703	00:00:27.740000
704	00:00:27.780000
705	00:00:27.819000
706	00:00:27.859000
707	00:00:27.898000
708	00:00:27.938000
709	00:00:27.977000
710	00:00:28.017000
711	00:00:28.056000
712	00:00:28.096000
713	00:00:28.136000
714	00:00:28.175000
715	00:00:28.215000
716	00:00:28.254000
717	00:00:28.294000
718	00:00:28.333000
719	00:00:28.373000
720	00:00:28.412000
721	00:00:28.452000
722	00:00:28.491000
723	00:00:28.531000
724	00:00:28.570000
725	00:00:28.610000
726	00:00:28.649000
727	00:00:28.689000
728	00:00:28.728000
729	00:00:28.768000
730	00:00:28.807000
731	00:00:28.847000
732	00:00:28.886000
733	00:00:28.926000
734	00:00:28.965000
735	00:00:29.005000
736	00:00:29.044000
737	00:00:29.084000
738	00:00:29.123000
739	00:00:29.163000
740	00:00:29.202000
741	00:00:29.242000
742	00:00:29.281000
743	00:00:29.321000
744	00:00:29.360000
745	00:00:29.400000
746	00:00:29.439000
747	00:00:29.479000
748	00:00:29.518000
749	00:00:29.558000
750	00:00:29.598000
751	00:00:29.637000
752	00:00:29.677000
753	00:00:29.716000
754	00:00:29.756000
755	00:00:29.795000
756	00:00:29.835000
757	00:00:29.874000
758	00:00:29.914000
759	00:00:29.953000
760	00:00:29.993000
761	00:00:30.032000
762	00:00:30.072000
763	00:00:30.111000
764	00:00:30.151000
765	00:00:30.190000
766	00:00:30.230000
767	00:00:30.269000
768	00:00:30.309000
769	00:00:30.348000
770	00:00:30.388000
771	00:00:30.427000
772	00:00:30.467000
773	00:00:30.506000
774	00:00:30.546000
775	00:00:30.585000
776	00:00:30.625000
777	00:00:30.664000
778	00:00:30.704000
779	00:00:30.743000
780	00:00:30.783000
781	00:00:30.822000
782	00:00:30.862000
783	00:00:30.901000
784	00:00:30.941000
785	00:00:30.980000
786	00:00:31.020000
787	00:00:31.059000
788	00:00:31.099000
789	00:00:31.139000
790	00:00:31.178000
791	00:00:31.217000
792	00:00:31.257000
793	00:00:31.297000
794	00:00:31.336000
795	00:00:31.375000
796	00:00:31.415000
797	00:00:31.455000
798	00:00:31.495000
799	00:00:31.535000
800	00:00:31.574000
801	00:00:31.614000
802	00:00:31.653000
803	00:00:31.693000
804	00:00:31.732000
805	00:00:31.772000
806	00:00:31.811000
807	00:00:31.851000
808	00:00:31.890000
809	00:00:31.930000
810	00:00:31.969000
811	00:00:32.009000
812	00:00:32.048000
813	00:00:32.088000
814	00:00:32.127000
815	00:00:32.167000
816	00:00:32.206000
817	00:00:32.246000
818	00:00:32.285000
819	00:00:32.325000
820	00:00:32.364000
821	00:00:32.404000
822	00:00:32.443000
823	00:00:32.483000
824	00:00:32.522000
825	00:00:32.562000
826	00:00:32.601000
827	00:00:32.641000
828	00:00:32.680000
829	00:00:32.720000
830	00:00:32.759000
831	00:00:32.799000
832	00:00:32.838000
833	00:00:32.878000
834	00:00:32.918000
835	00:00:32.957000
836	00:00:32.997000
837	00:00:33.036000
838	00:00:33.076000
839	00:00:33.115000
840	00:00:33.155000
841	00:00:33.194000
842	00:00:33.234000
843	00:00:33.273000
844	00:00:33.313000
845	00:00:33.352000
846	00:00:33.392000
847	00:00:33.431000
848	00:00:33.471000
849	00:00:33.510000
850	00:00:33.550000
851	00:00:33.589000
852	00:00:33.629000
853	00:00:33.668000
854	00:00:33.708000
855	00:00:33.747000
856	00:00:33.787000
857	00:00:33.826000
858	00:00:33.866000
859	00:00:33.905000
860	00:00:33.945000
861	00:00:33.984000
862	00:00:34.024000
863	00:00:34.063000
864	00:00:34.103000
865	00:00:34.142000
866	00:00:34.182000
867	00:00:34.221000
868	00:00:34.261000
869	00:00:34.300000
870	00:00:34.340000
871	00:00:34.379000
872	00:00:34.419000
873	00:00:34.459000
874	00:00:34.498000
875	00:00:34.538000
876	00:00:34.577000
877	00:00:34.617000
878	00:00:34.656000
879	00:00:34.696000
880	00:00:34.735000
881	00:00:34.775000
882	00:00:34.814000
883	00:00:34.854000
884	00:00:34.893000
885	00:00:34.933000
886	00:00:34.972000
887	00:00:35.012000
888	00:00:35.051000
889	00:00:35.091000
890	00:00:35.130000
891	00:00:35.170000
892	00:00:35.209000
893	00:00:35.249000
894	00:00:35.288000
895	00:00:35.328000
896	00:00:35.367000
897	00:00:35.407000
898	00:00:35.446000
899	00:00:35.486000
900	00:00:35.525000
901	00:00:35.565000
902	00:00:35.604000
903	00:00:35.644000
904	00:00:35.683000
905	00:00:35.723000
906	00:00:35.762000
907	00:00:35.802000
908	00:00:35.841000
909	00:00:35.881000
910	00:00:35.920000
911	00:00:35.960000
912	00:00:36
913	00:00:36.039000
914	00:00:36.079000
915	00:00:36.118000
916	00:00:36.158000
917	00:00:36.197000
918	00:00:36.236000
919	00:00:36.276000
920	00:00:36.316000
921	00:00:36.355000
922	00:00:36.395000
923	00:00:36.434000
924	00:00:36.474000
925	00:00:36.513000
926	00:00:36.553000
927	00:00:36.592000
928	00:00:36.632000
929	00:00:36.671000
930	00:00:36.711000
931	00:00:36.750000
932	00:00:36.790000
933	00:00:36.829000
934	00:00:36.869000
935	00:00:36.908000
936	00:00:36.948000
937	00:00:36.987000
938	00:00:37.027000
939	00:00:37.066000
940	00:00:37.106000
941	00:00:37.145000
942	00:00:37.185000
943	00:00:37.224000
944	00:00:37.264000
945	00:00:37.303000
946	00:00:37.343000
947	00:00:37.382000
948	00:00:37.422000
949	00:00:37.461000
950	00:00:37.501000
951	00:00:37.540000
952	00:00:37.580000
953	00:00:37.619000
954	00:00:37.659000
955	00:00:37.698000
956	00:00:37.738000
957	00:00:37.778000
958	00:00:37.817000
959	00:00:37.857000
960	00:00:37.896000
961	00:00:37.936000
962	00:00:37.975000
963	00:00:38.015000
964	00:00:38.054000
965	00:00:38.094000
966	00:00:38.133000
967	00:00:38.173000
968	00:00:38.212000
969	00:00:38.252000
970	00:00:38.291000
971	00:00:38.331000
972	00:00:38.370000
973	00:00:38.410000
974	00:00:38.449000
975	00:00:38.489000
976	00:00:38.528000
977	00:00:38.568000
978	00:00:38.607000
979	00:00:38.647000
980	00:00:38.686000
981	00:00:38.726000
982	00:00:38.765000
983	00:00:38.805000
984	00:00:38.844000
985	00:00:38.884000
986	00:00:38.923000
987	00:00:38.963000
988	00:00:39.002000
989	00:00:39.042000
990	00:00:39.081000
991	00:00:39.121000
992	00:00:39.160000
993	00:00:39.200000
994	00:00:39.239000
995	00:00:39.279000
996	00:00:39.319000
997	00:00:39.358000
998	00:00:39.398000
999	00:00:39.437000
1000	00:00:39.477000
1001	00:00:39.516000
1002	00:00:39.556000
1003	00:00:39.595000
1004	00:00:39.635000
1005	00:00:39.674000
1006	00:00:39.714000
1007	00:00:39.753000
1008	00:00:39.793000
1009	00:00:39.832000
1010	00:00:39.872000
1011	00:00:39.911000
1012	00:00:39.951000
1013	00:00:39.990000
1014	00:00:40.030000
1015	00:00:40.069000
1016	00:00:40.109000
1017	00:00:40.148000
1018	00:00:40.188000
1019	00:00:40.227000
1020	00:00:40.267000
1021	00:00:40.306000
1022	00:00:40.346000
1023	00:00:40.385000
1024	00:00:40.425000
1025	00:00:40.464000
1026	00:00:40.504000
1027	00:00:40.543000
1028	00:00:40.583000
1029	00:00:40.622000
1030	00:00:40.662000
1031	00:00:40.701000
1032	00:00:40.741000
1033	00:00:40.780000
1034	00:00:40.820000
1035	00:00:40.860000
1036	00:00:40.899000
1037	00:00:40.939000
1038	00:00:40.978000
1039	00:00:41.017000
1040	00:00:41.057000
1041	00:00:41.096000
1042	00:00:41.136000
1043	00:00:41.176000
1044	00:00:41.215000
1045	00:00:41.255000
1046	00:00:41.294000
1047	00:00:41.334000
1048	00:00:41.373000
1049	00:00:41.413000
1050	00:00:41.452000
1051	00:00:41.492000
1052	00:00:41.532000
1053	00:00:41.572000
1054	00:00:41.611000
1055	00:00:41.651000
1056	00:00:41.690000
1057	00:00:41.730000
1058	00:00:41.769000
1059	00:00:41.809000
1060	00:00:41.848000
1061	00:00:41.888000
1062	00:00:41.927000
1063	00:00:41.967000
1064	00:00:42.006000
1065	00:00:42.046000
1066	00:00:42.085000
1067	00:00:42.125000
1068	00:00:42.164000
1069	00:00:42.204000
1070	00:00:42.243000
1071	00:00:42.283000
1072	00:00:42.322000
1073	00:00:42.362000
1074	00:00:42.401000
1075	00:00:42.441000
1076	00:00:42.480000
1077	00:00:42.520000
1078	00:00:42.559000
1079	00:00:42.599000
1080	00:00:42.639000
1081	00:00:42.678000
1082	00:00:42.718000
1083	00:00:42.757000
1084	00:00:42.797000
1085	00:00:42.836000
1086	00:00:42.876000
1087	00:00:42.915000
1088	00:00:42.955000
1089	00:00:42.994000
1090	00:00:43.034000
1091	00:00:43.073000
1092	00:00:43.113000
1093	00:00:43.152000
1094	00:00:43.192000
1095	00:00:43.231000
1096	00:00:43.271000
1097	00:00:43.310000
1098	00:00:43.350000
1099	00:00:43.389000
1100	00:00:43.429000
1101	00:00:43.468000
1102	00:00:43.508000
1103	00:00:43.547000
1104	00:00:43.587000
1105	00:00:43.626000
1106	00:00:43.666000
1107	00:00:43.705000
1108	00:00:43.745000
1109	00:00:43.784000
1110	00:00:43.824000
1111	00:00:43.863000
1112	00:00:43.903000
1113	00:00:43.942000
1114	00:00:43.982000
1115	00:00:44.021000
1116	00:00:44.061000
1117	00:00:44.100000
1118	00:00:44.140000
1119	00:00:44.180000
1120	00:00:44.219000
1121	00:00:44.259000
1122	00:00:44.298000
1123	00:00:44.338000
1124	00:00:44.377000
1125	00:00:44.417000
1126	00:00:44.456000
1127	00:00:44.496000
1128	00:00:44.535000
1129	00:00:44.575000
1130	00:00:44.614000
1131	00:00:44.654000
1132	00:00:44.693000
1133	00:00:44.733000
1134	00:00:44.772000
1135	00:00:44.812000
1136	00:00:44.851000
1137	00:00:44.891000
1138	00:00:44.930000
1139	00:00:44.970000
1140	00:00:45.009000
1141	00:00:45.049000
1142	00:00:45.088000
1143	00:00:45.128000
1144	00:00:45.167000
1145	00:00:45.207000
1146	00:00:45.246000
1147	00:00:45.286000
1148	00:00:45.325000
1149	00:00:45.365000
1150	00:00:45.404000
1151	00:00:45.444000
1152	00:00:45.483000
1153	00:00:45.523000
1154	00:00:45.562000
1155	00:00:45.602000
1156	00:00:45.641000
1157	00:00:45.681000
1158	00:00:45.721000
1159	00:00:45.760000
1160	00:00:45.800000
1161	00:00:45.839000
1162	00:00:45.878000
1163	00:00:45.918000
1164	00:00:45.958000
1165	00:00:45.997000
1166	00:00:46.037000
1167	00:00:46.076000
1168	00:00:46.116000
1169	00:00:46.155000
1170	00:00:46.195000
1171	00:00:46.234000
1172	00:00:46.274000
1173	00:00:46.313000
1174	00:00:46.353000
1175	00:00:46.392000
1176	00:00:46.432000
1177	00:00:46.471000
1178	00:00:46.511000
1179	00:00:46.550000
1180	00:00:46.590000
1181	00:00:46.629000
1182	00:00:46.669000
1183	00:00:46.708000
1184	00:00:46.748000
1185	00:00:46.787000
1186	00:00:46.827000
1187	00:00:46.866000
1188	00:00:46.906000
1189	00:00:46.945000
1190	00:00:46.985000
1191	00:00:47.024000
1192	00:00:47.064000
1193	00:00:47.103000
1194	00:00:47.143000
1195	00:00:47.183000
1196	00:00:47.222000
1197	00:00:47.261000
1198	00:00:47.301000
1199	00:00:47.340000
1200	00:00:47.380000
1201	00:00:47.419000
1202	00:00:47.459000
1203	00:00:47.499000
1204	00:00:47.538000
1205	00:00:47.578000
1206	00:00:47.617000
1207	00:00:47.657000
1208	00:00:47.696000
1209	00:00:47.736000
1210	00:00:47.775000
1211	00:00:47.815000
1212	00:00:47.854000
1213	00:00:47.894000
1214	00:00:47.933000
1215	00:00:47.973000
1216	00:00:48.012000
1217	00:00:48.052000
1218	00:00:48.091000
1219	00:00:48.131000
1220	00:00:48.170000
1221	00:00:48.210000
1222	00:00:48.249000
1223	00:00:48.289000
1224	00:00:48.328000
1225	00:00:48.368000
1226	00:00:48.407000
1227	00:00:48.447000
1228	00:00:48.486000
1229	00:00:48.526000
1230	00:00:48.565000
1231	00:00:48.605000
1232	00:00:48.644000
1233	00:00:48.684000
1234	00:00:48.723000
1235	00:00:48.763000
1236	00:00:48.802000
1237	00:00:48.842000
1238	00:00:48.881000
1239	00:00:48.921000
1240	00:00:48.960000
1241	00:00:49
1242	00:00:49.040000
1243	00:00:49.079000
1244	00:00:49.119000
1245	00:00:49.158000
1246	00:00:49.198000
1247	00:00:49.237000
1248	00:00:49.277000
1249	00:00:49.316000
1250	00:00:49.356000
1251	00:00:49.395000
1252	00:00:49.435000
1253	00:00:49.474000
1254	00:00:49.514000
1255	00:00:49.553000
1256	00:00:49.593000
1257	00:00:49.632000
1258	00:00:49.672000
1259	00:00:49.711000
1260	00:00:49.751000
1261	00:00:49.790000
1262	00:00:49.830000
1263	00:00:49.869000
1264	00:00:49.909000
1265	00:00:49.948000
1266	00:00:49.988000
1267	00:00:50.027000
1268	00:00:50.067000
1269	00:00:50.106000
1270	00:00:50.146000
1271	00:00:50.185000
1272	00:00:50.225000
1273	00:00:50.264000
1274	00:00:50.304000
1275	00:00:50.343000
1276	00:00:50.383000
1277	00:00:50.422000
1278	00:00:50.462000
1279	00:00:50.502000
1280	00:00:50.541000
1281	00:00:50.581000
1282	00:00:50.620000
1283	00:00:50.660000
1284	00:00:50.699000
1285	00:00:50.739000
1286	00:00:50.778000
1287	00:00:50.818000
1288	00:00:50.857000
1289	00:00:50.897000
1290	00:00:50.936000
1291	00:00:50.976000
1292	00:00:51.015000
1293	00:00:51.055000
1294	00:00:51.094000
1295	00:00:51.134000
1296	00:00:51.173000
1297	00:00:51.213000
1298	00:00:51.252000
1299	00:00:51.292000
1300	00:00:51.331000
1301	00:00:51.371000
1302	00:00:51.410000
1303	00:00:51.450000
1304	00:00:51.489000
1305	00:00:51.530000
1306	00:00:51.569000
1307	00:00:51.609000
1308	00:00:51.648000
1309	00:00:51.688000
1310	00:00:51.727000
1311	00:00:51.767000
1312	00:00:51.806000
1313	00:00:51.846000
1314	00:00:51.885000
1315	00:00:51.925000
1316	00:00:51.964000
1317	00:00:52.004000
1318	00:00:52.044000
1319	00:00:52.083000
1320	00:00:52.123000
1321	00:00:52.162000
1322	00:00:52.201000
1323	00:00:52.241000
1324	00:00:52.280000
1325	00:00:52.320000
1326	00:00:52.360000
1327	00:00:52.399000
1328	00:00:52.439000
1329	00:00:52.478000
1330	00:00:52.518000
1331	00:00:52.557000
1332	00:00:52.597000
1333	00:00:52.636000
1334	00:00:52.676000
1335	00:00:52.715000
1336	00:00:52.755000
1337	00:00:52.794000
1338	00:00:52.834000
1339	00:00:52.873000
1340	00:00:52.913000
1341	00:00:52.952000
1342	00:00:52.992000
1343	00:00:53.031000
1344	00:00:53.071000
1345	00:00:53.110000
1346	00:00:53.150000
1347	00:00:53.189000
1348	00:00:53.229000
1349	00:00:53.268000
1350	00:00:53.308000
1351	00:00:53.347000
1352	00:00:53.387000
1353	00:00:53.426000
1354	00:00:53.466000
1355	00:00:53.505000
1356	00:00:53.545000
1357	00:00:53.584000
1358	00:00:53.624000
1359	00:00:53.663000
1360	00:00:53.703000
1361	00:00:53.742000
1362	00:00:53.782000
1363	00:00:53.821000
1364	00:00:53.861000
1365	00:00:53.901000
1366	00:00:53.940000
1367	00:00:53.980000
1368	00:00:54.019000
1369	00:00:54.059000
1370	00:00:54.098000
1371	00:00:54.138000
1372	00:00:54.177000
1373	00:00:54.217000
1374	00:00:54.256000
1375	00:00:54.296000
1376	00:00:54.335000
1377	00:00:54.375000
1378	00:00:54.414000
1379	00:00:54.454000
1380	00:00:54.493000
1381	00:00:54.533000
1382	00:00:54.572000
1383	00:00:54.612000
1384	00:00:54.651000
1385	00:00:54.691000
1386	00:00:54.730000
1387	00:00:54.770000
1388	00:00:54.809000
1389	00:00:54.849000
1390	00:00:54.888000
1391	00:00:54.928000
1392	00:00:54.967000
1393	00:00:55.007000
1394	00:00:55.046000
1395	00:00:55.086000
1396	00:00:55.125000
1397	00:00:55.165000
1398	00:00:55.204000
1399	00:00:55.244000
1400	00:00:55.283000
1401	00:00:55.323000
1402	00:00:55.363000
1403	00:00:55.402000
1404	00:00:55.442000
1405	00:00:55.481000
1406	00:00:55.521000
1407	00:00:55.560000
1408	00:00:55.600000
1409	00:00:55.639000
1410	00:00:55.679000
1411	00:00:55.718000
1412	00:00:55.758000
1413	00:00:55.797000
1414	00:00:55.837000
1415	00:00:55.876000
1416	00:00:55.916000
1417	00:00:55.955000
1418	00:00:55.995000
1419	00:00:56.034000
1420	00:00:56.074000
1421	00:00:56.113000
1422	00:00:56.153000
1423	00:00:56.192000
1424	00:00:56.232000
1425	00:00:56.271000
1426	00:00:56.311000
1427	00:00:56.350000
1428	00:00:56.390000
1429	00:00:56.429000
1430	00:00:56.469000
1431	00:00:56.508000
1432	00:00:56.548000
1433	00:00:56.587000
1434	00:00:56.627000
1435	00:00:56.666000
1436	00:00:56.706000
1437	00:00:56.745000
1438	00:00:56.785000
1439	00:00:56.824000
1440	00:00:56.864000
1441	00:00:56.903000
1442	00:00:56.943000
1443	00:00:56.982000
1444	00:00:57.022000
1445	00:00:57.061000
1446	00:00:57.101000
1447	00:00:57.140000
1448	00:00:57.180000
1449	00:00:57.220000
1450	00:00:57.259000
1451	00:00:57.299000
1452	00:00:57.338000
1453	00:00:57.378000
